# Supplementary material for: Design, synthesis, anti-inflammatory evaluation, and molecular docking studies of novel quinazoline-4(3H)-one-2-carbothioamide derivatives
Source: Royal Society of Chemistry journal article supplement (doi:10.1039/d4ra09094b), 2025-01-01

## Supplementary Information

### Design, synthesis, anti-inflammatory evaluation, and molecular docking studies of novel quinazoline-4(3H)-one-2-carbothioamide derivatives

Le Thanh Hang Nguyen,<sup>a</sup> Vu Dinh Hoang,<sup>a</sup> Minh Quan Pham,<sup>bc</sup> Quoc Anh Ngo,<sup>\*d</sup> and Ngoc Binh Vo,<sup>\*d</sup>

<sup>a</sup>School of Chemistry and Life Sciences, Hanoi University of Science and Technology, 1 Dai Co Viet Street, Hanoi, Viet Nam.

<sup>b</sup>Institute of Natural Products Chemistry (INPC), Vietnam Academy of Science and Technology (VAST), Hanoi, Vietnam.

<sup>c</sup>Graduate University of Science and Technology (GUST), Vietnam Academy of Science and Technology (VAST), Hanoi, Vietnam

<sup>d</sup>Institute of Chemistry, Vietnam Academy of Science and Technology, Hanoi, Vietnam.

\* Corresponding Author: Ngoc Binh Vo<sup>\*d</sup>. E-mail: binhvn.tq@gmail.com

#### Index:

|     |                                                                                                     |         |
|-----|-----------------------------------------------------------------------------------------------------|---------|
| 1.  | IR, <sup>1</sup> H-NMR, <sup>13</sup> C-NMR, and HR-MS spectrums of compound <b>10</b>              | S1-S2   |
| 2.  | IR, <sup>1</sup> H-NMR, <sup>13</sup> C-NMR, and HR-MS spectrums of compound <b>8a</b>              | S3-S4   |
| 3.  | IR, <sup>1</sup> H-NMR, <sup>13</sup> C-NMR, and HR-MS spectrums of compound <b>8b</b>              | S5-S6   |
| 4.  | IR, <sup>1</sup> H-NMR, <sup>13</sup> C-NMR, and HR-MS spectrums of compound <b>8c</b>              | S7-S8   |
| 5.  | IR, <sup>1</sup> H-NMR, <sup>13</sup> C-NMR, HR-MS, and HPLC spectrums of compound <b>8d</b>        | S9-S11  |
| 6.  | IR, <sup>1</sup> H-NMR, <sup>13</sup> C-NMR, and HR-MS spectrums of compound <b>8e</b>              | S11-S13 |
| 7.  | IR, <sup>1</sup> H-NMR, <sup>13</sup> C-NMR, and HR-MS spectrums of compound <b>8f</b>              | S13-S15 |
| 8.  | IR, <sup>1</sup> H-NMR, <sup>13</sup> C-NMR, HR-MS, and HPLC spectrums of compound <b>8g</b>        | S15-S17 |
| 9.  | IR, <sup>1</sup> H-NMR, <sup>13</sup> C-NMR, and HR-MS spectrums of compound <b>8h</b>              | S17-S19 |
| 10. | IR, <sup>1</sup> H-NMR, <sup>13</sup> C-NMR, and HR-MS spectrums of compound <b>8i</b>              | S19-S21 |
| 11. | IR, <sup>1</sup> H-NMR, <sup>13</sup> C-NMR, NOESY, HR-MS, and HPLC spectrums of compound <b>8k</b> | S21-S24 |
| 12. | IR, <sup>1</sup> H-NMR, <sup>13</sup> C-NMR, and HR-MS spectrums of compound <b>8l</b>              | S24-S26 |
| 13. | IR, <sup>1</sup> H-NMR, <sup>13</sup> C-NMR, and HR-MS spectrums of compound <b>8m</b>              | S26-S28 |
| 14. | IR, <sup>1</sup> H-NMR, <sup>13</sup> C-NMR, and HR-MS spectrums of compound <b>8n</b>              | S28-S30 |
| 15. | IR, <sup>1</sup> H-NMR, <sup>13</sup> C-NMR, and HR-MS spectrums of compound <b>8o</b>              | S30-S32 |
| 16. | IR, <sup>1</sup> H-NMR, <sup>13</sup> C-NMR, and HR-MS spectrums of compound <b>8p</b>              | S32-S34 |
| 17. | IR, <sup>1</sup> H-NMR, <sup>13</sup> C-NMR, and HR-MS spectrums of compound <b>8q</b>              | S34-S36 |

## IR spectra of compound **10**

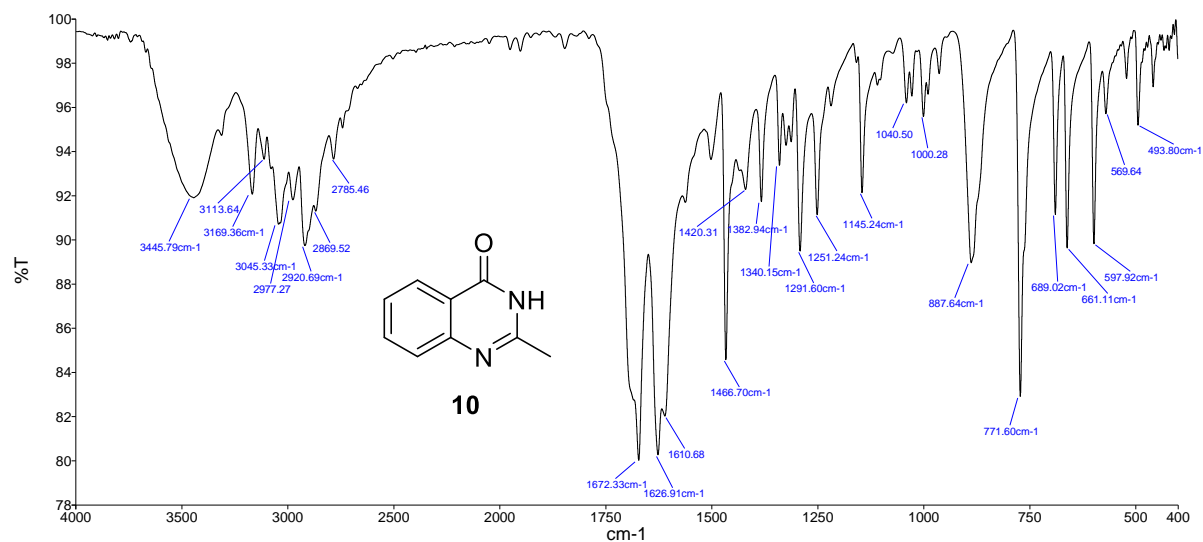

## <sup>1</sup>H NMR (DMSO-*d*<sub>6</sub>, 600 MHz) spectrum of compound **10**

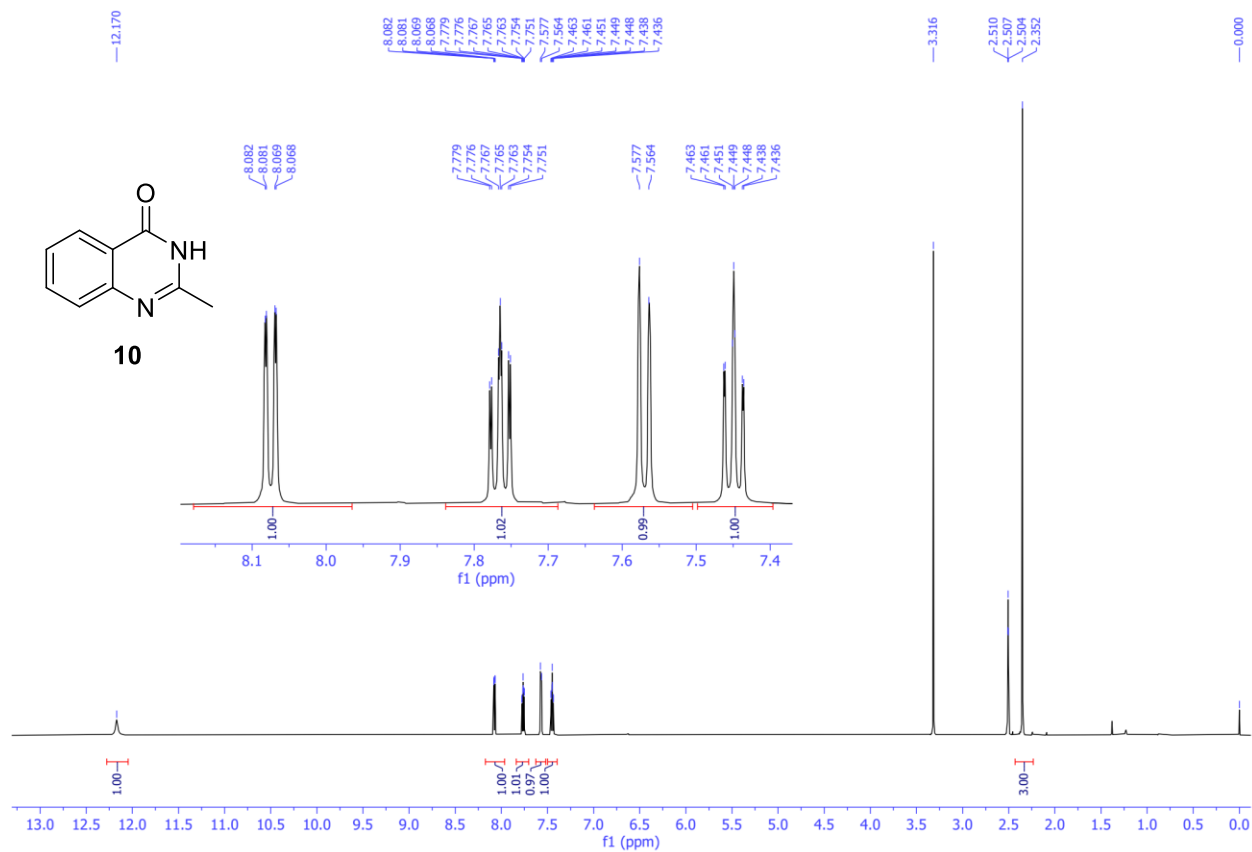

<sup>13</sup>C NMR (DMSO-*d*<sub>6</sub>, 150 MHz) spectrum of compound **10**

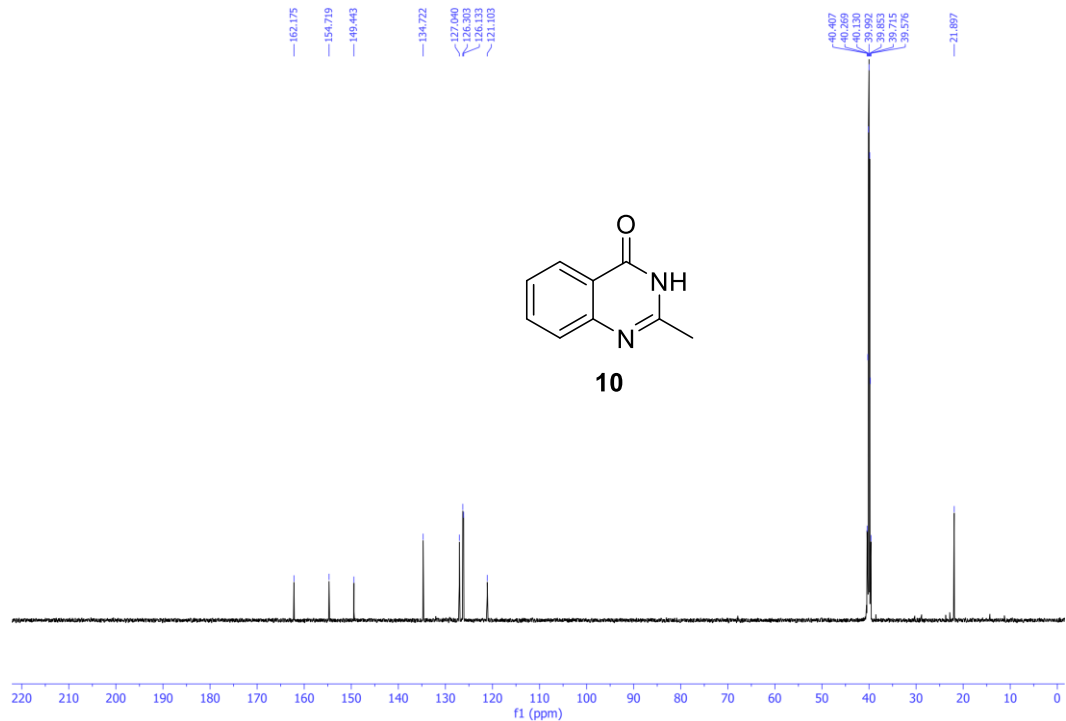

HRMS spectrum of compound **10**

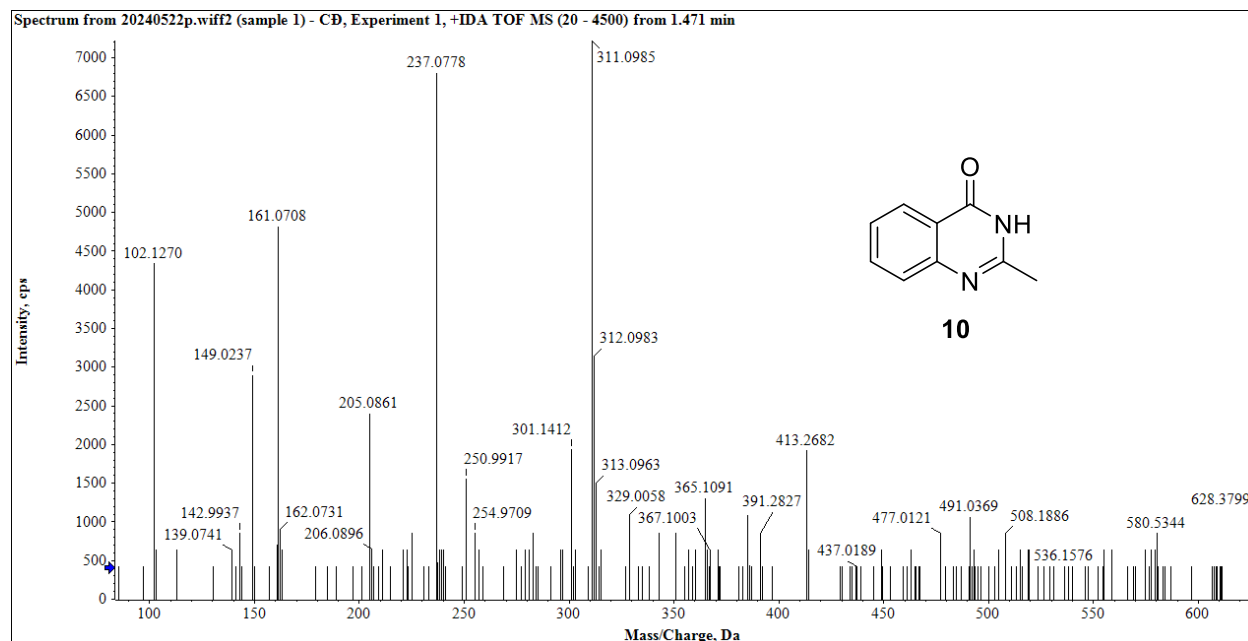

### IR spectra of compound **8a**

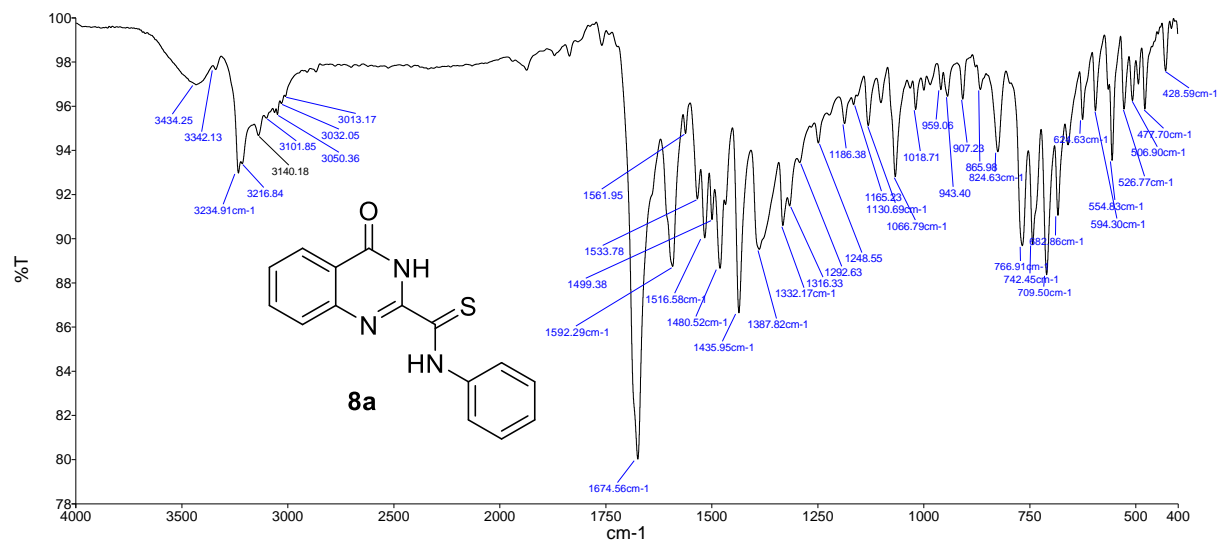

### <sup>1</sup>H NMR (CDCl<sub>3</sub>, 600 MHz) spectrum of compound **8a**

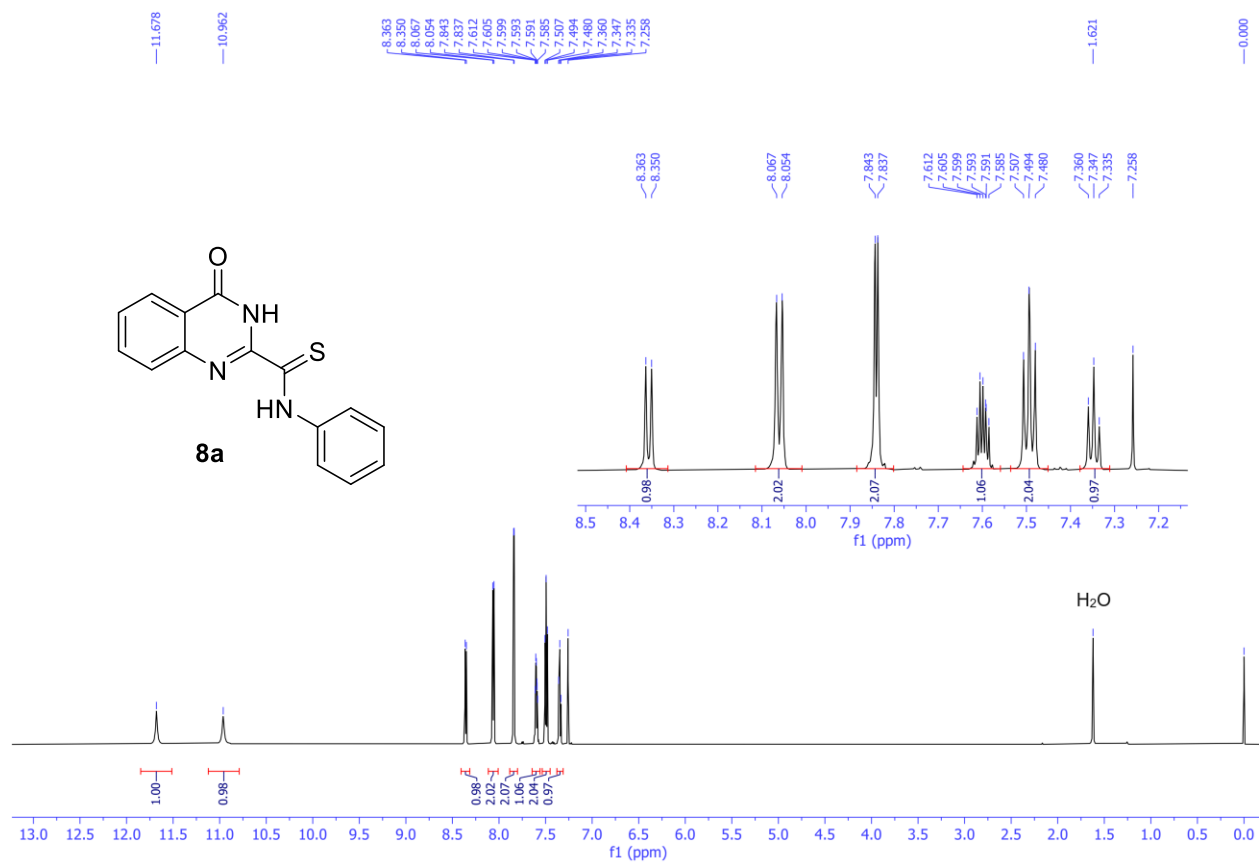

$^{13}\text{C}$  NMR ( $\text{CDCl}_3$ , 150 MHz) spectrum of compound **8a**

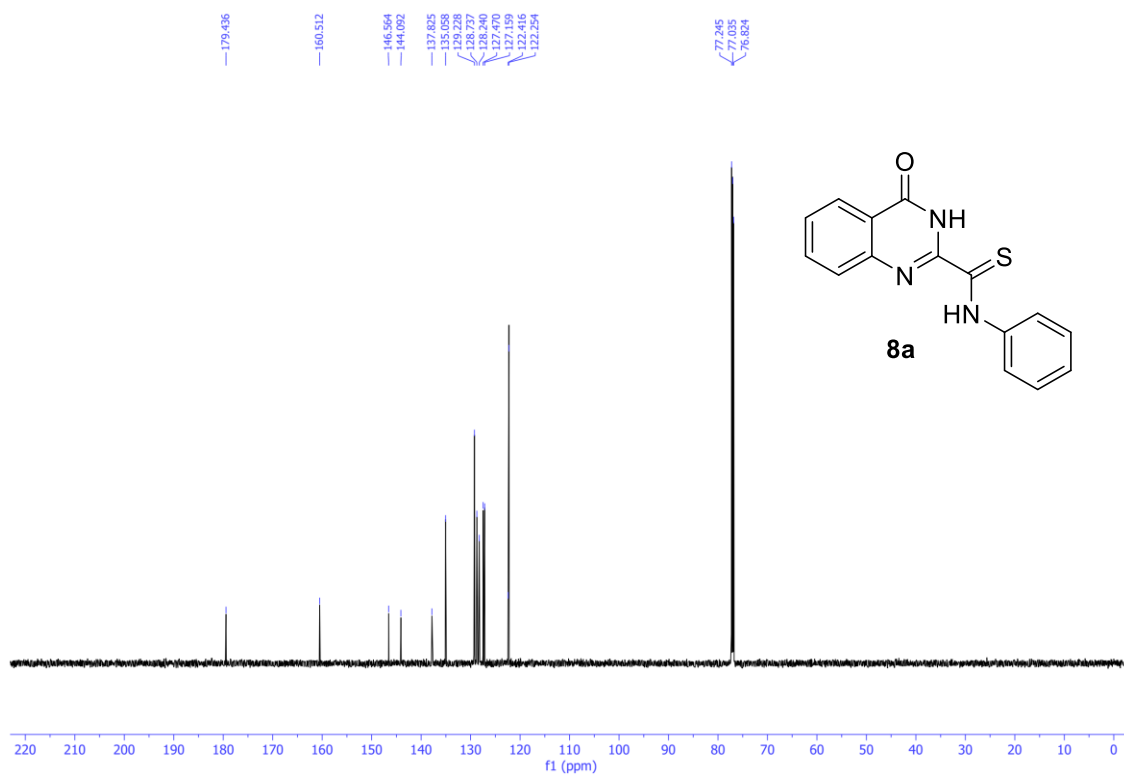

HRMS spectrum of compound **8a**

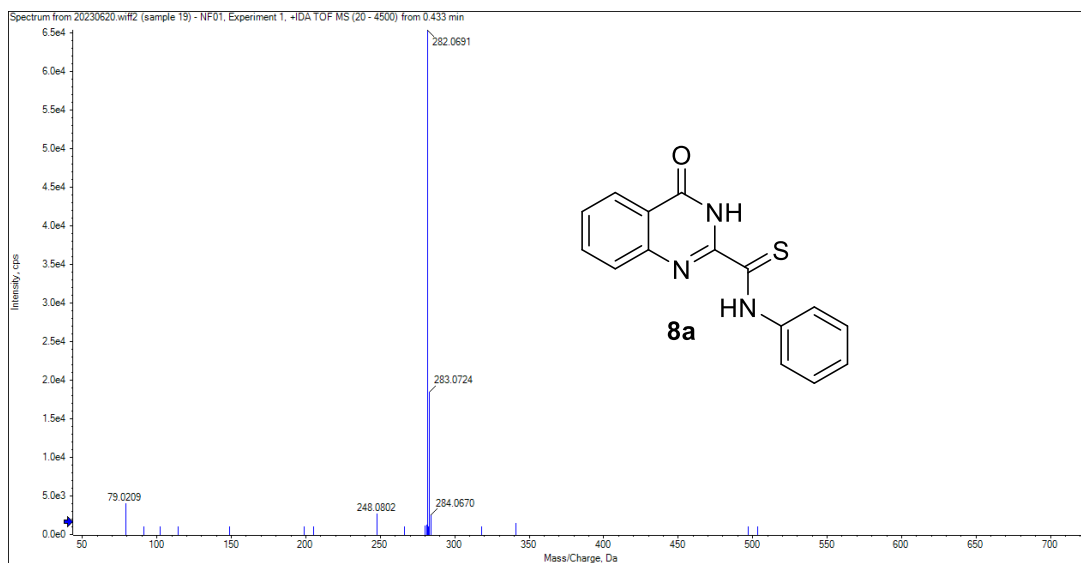

### IR spectra of compound **8b**

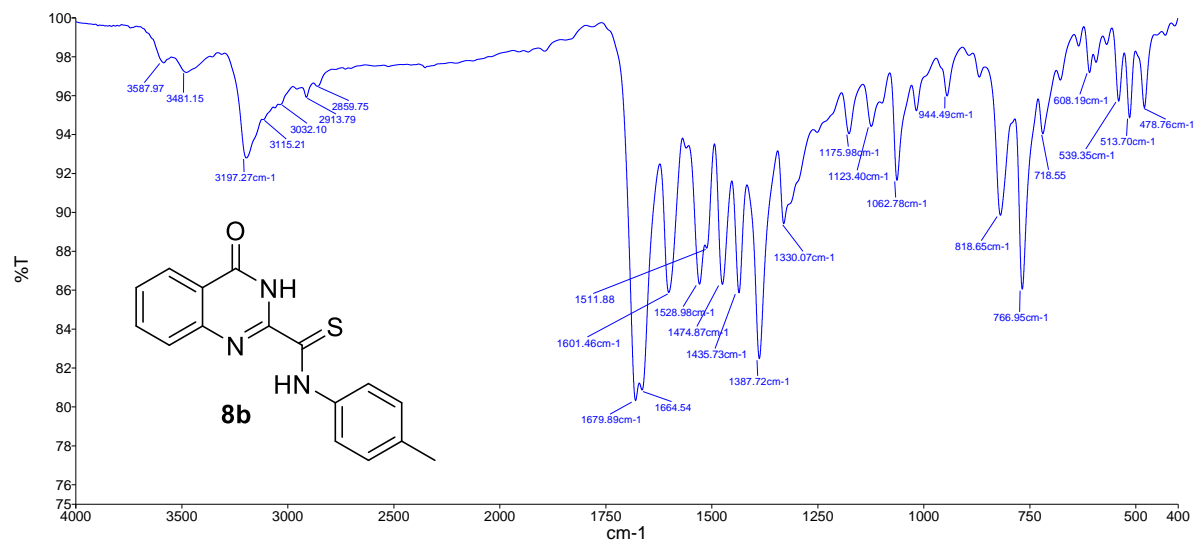

### <sup>1</sup>H NMR (CDCl<sub>3</sub>, 600 MHz) spectrum of compound **8b**

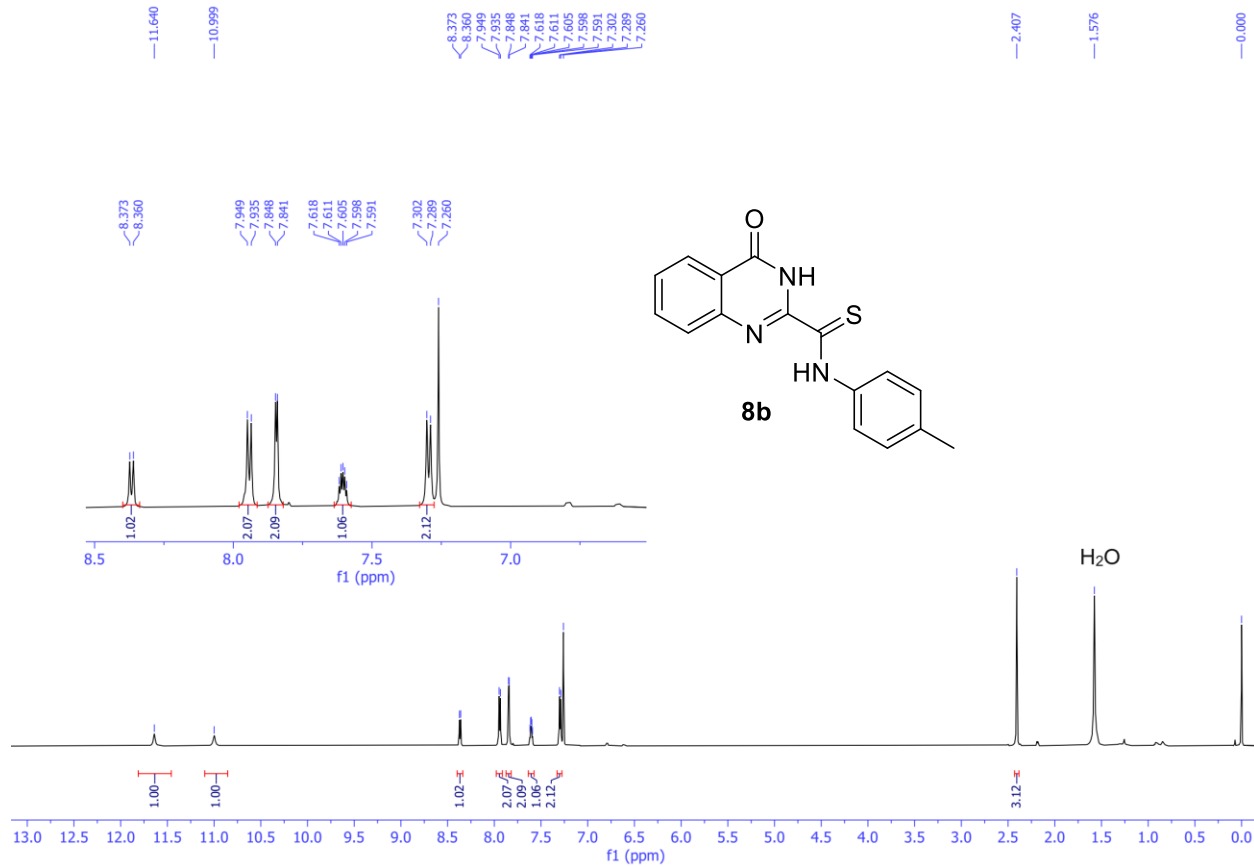

$^{13}\text{C}$  NMR ( $\text{CDCl}_3$ , 150 MHz) spectrum of compound **8b**

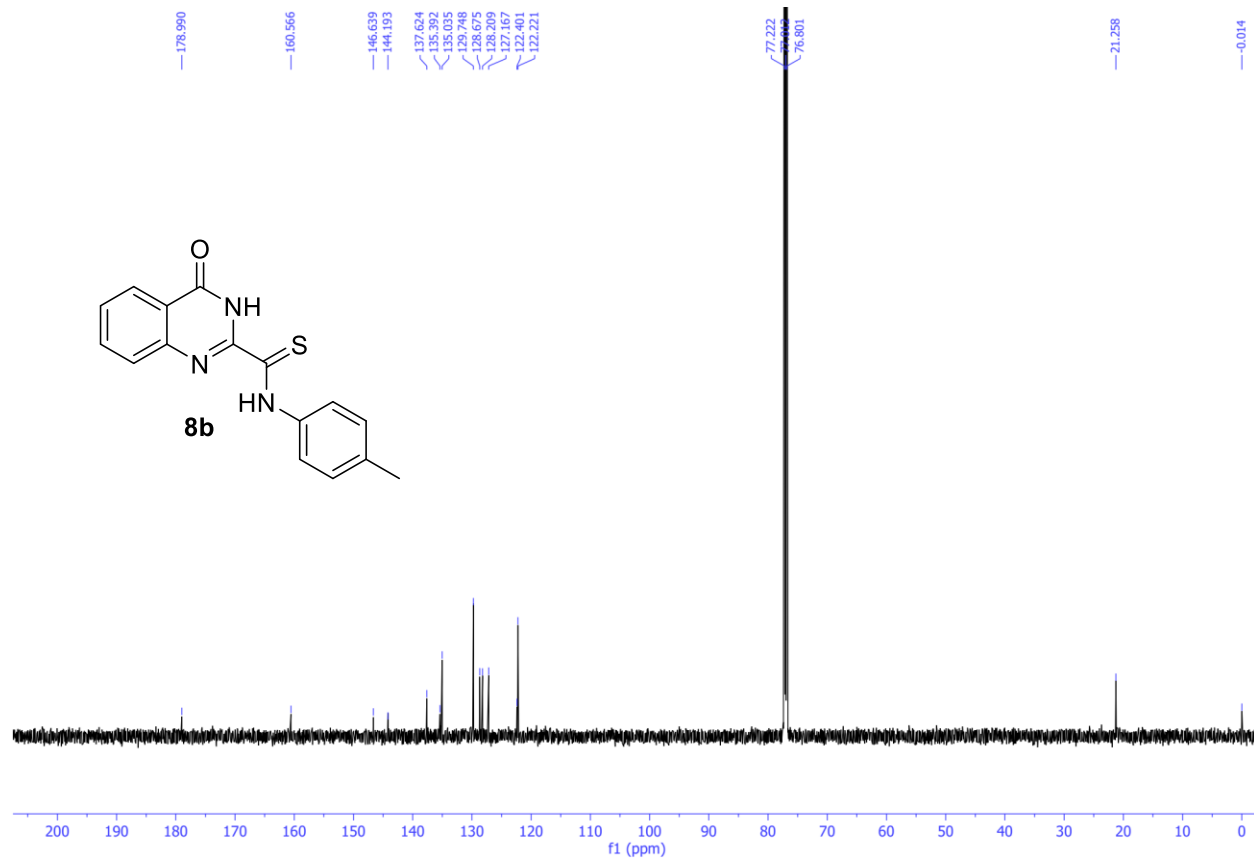

HRMS spectrum of compound **8b**

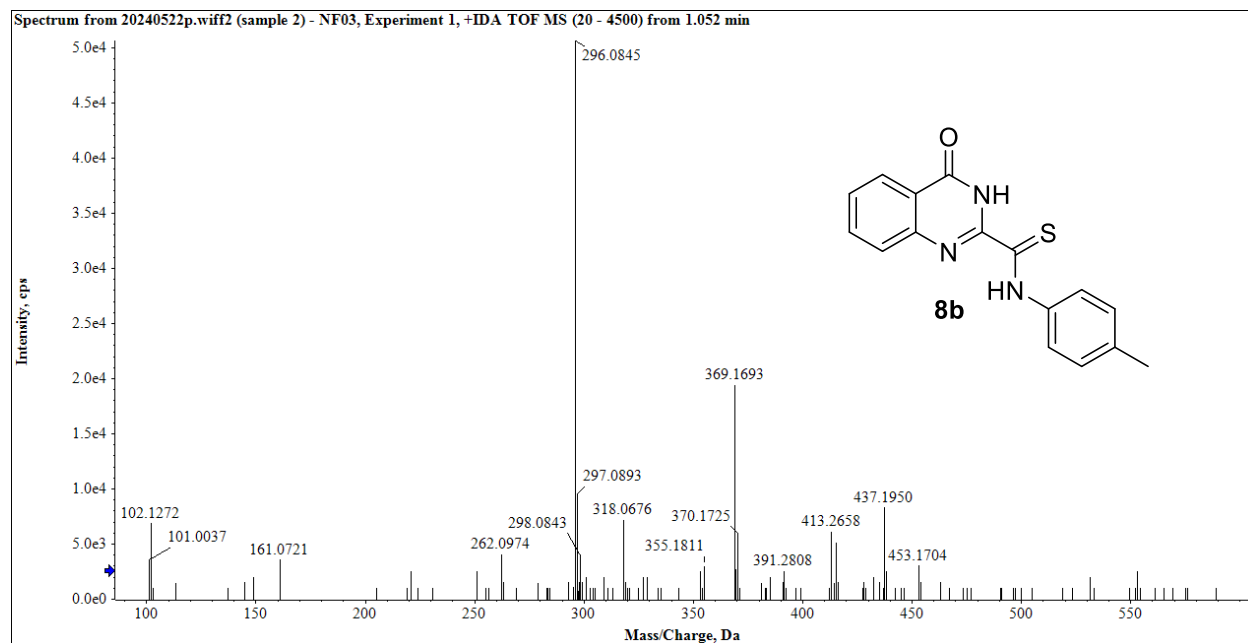

## IR spectra of compound **8c**

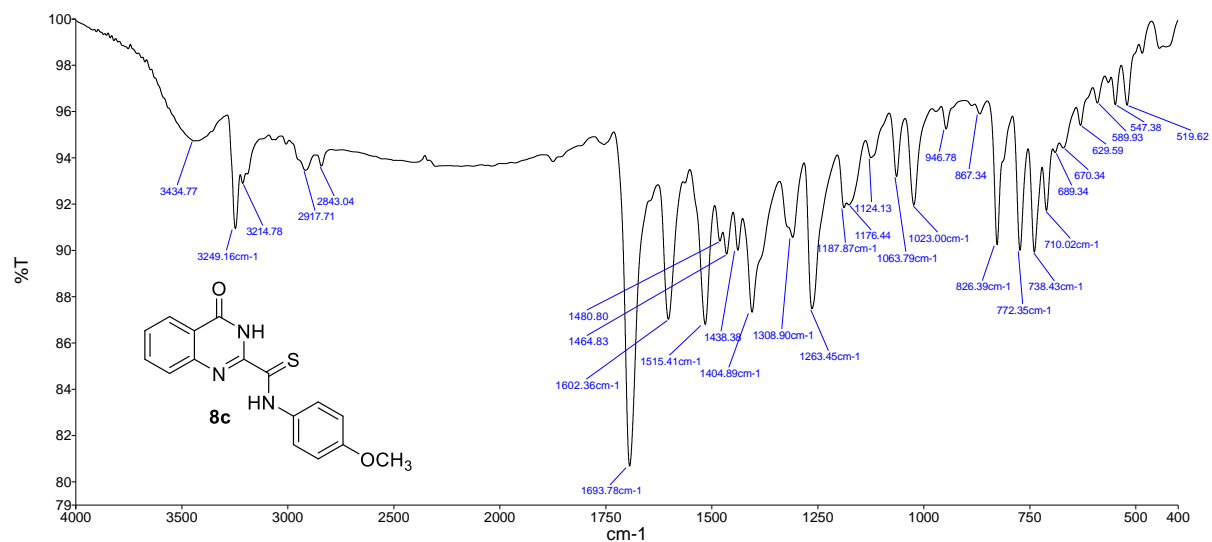

## $^1\text{H}$ NMR ( $\text{CDCl}_3$ , 600 MHz) spectrum of compound **8c**

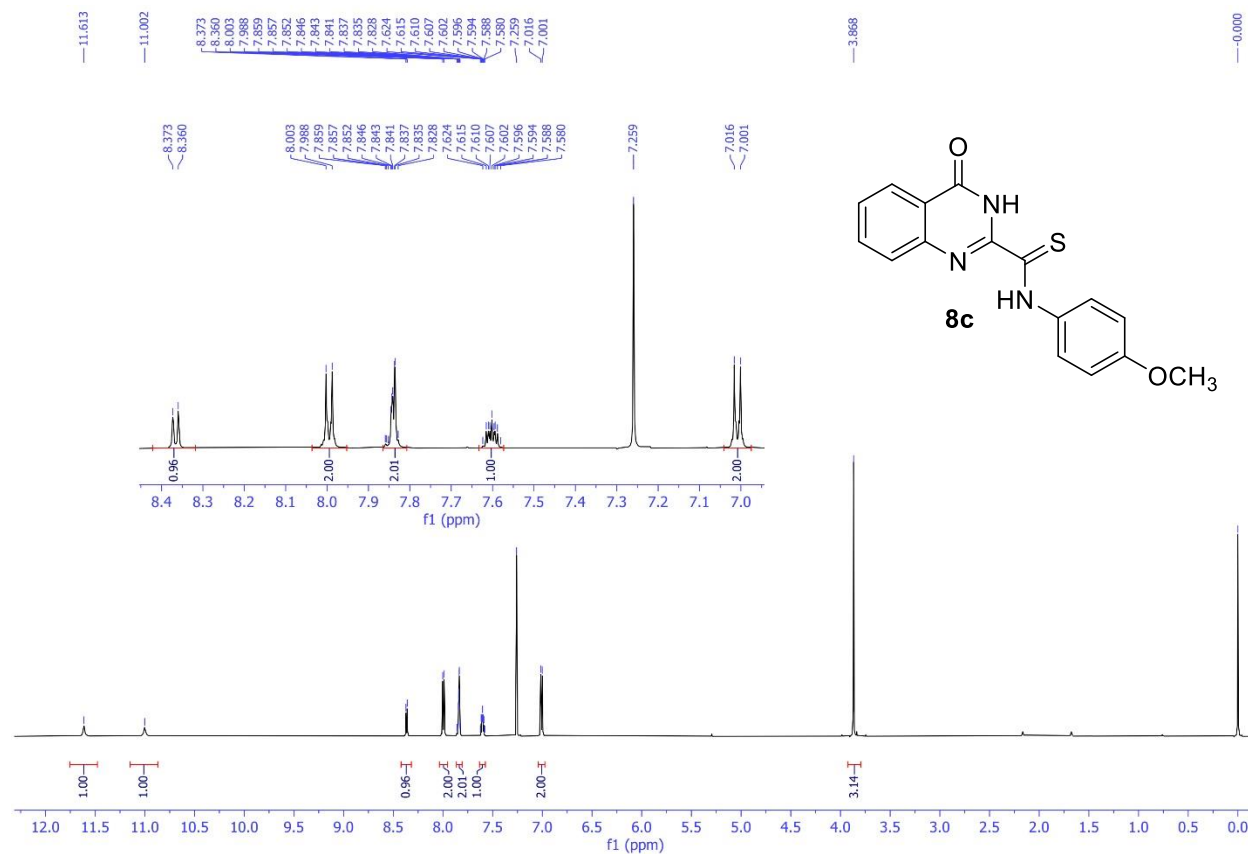



$^{13}\text{C}$  NMR ( $\text{CDCl}_3$ , 125 MHz) spectrum of compound **8c**

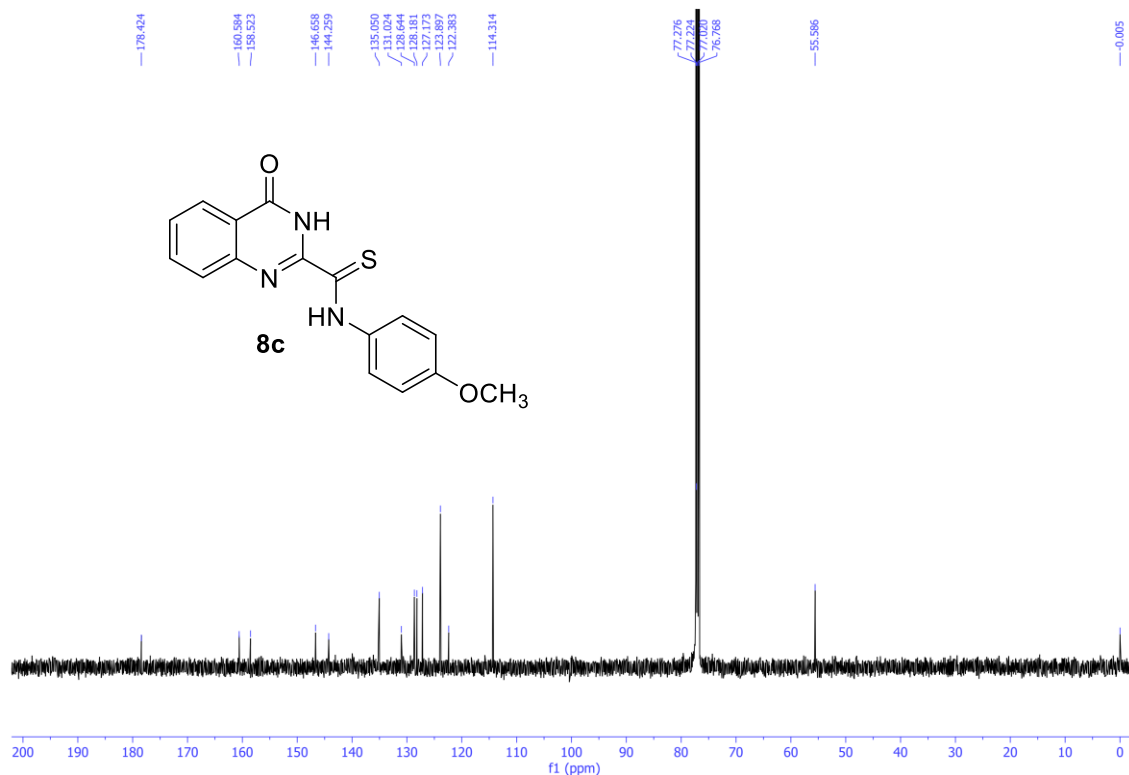

HRMS spectrum of compound **8c**

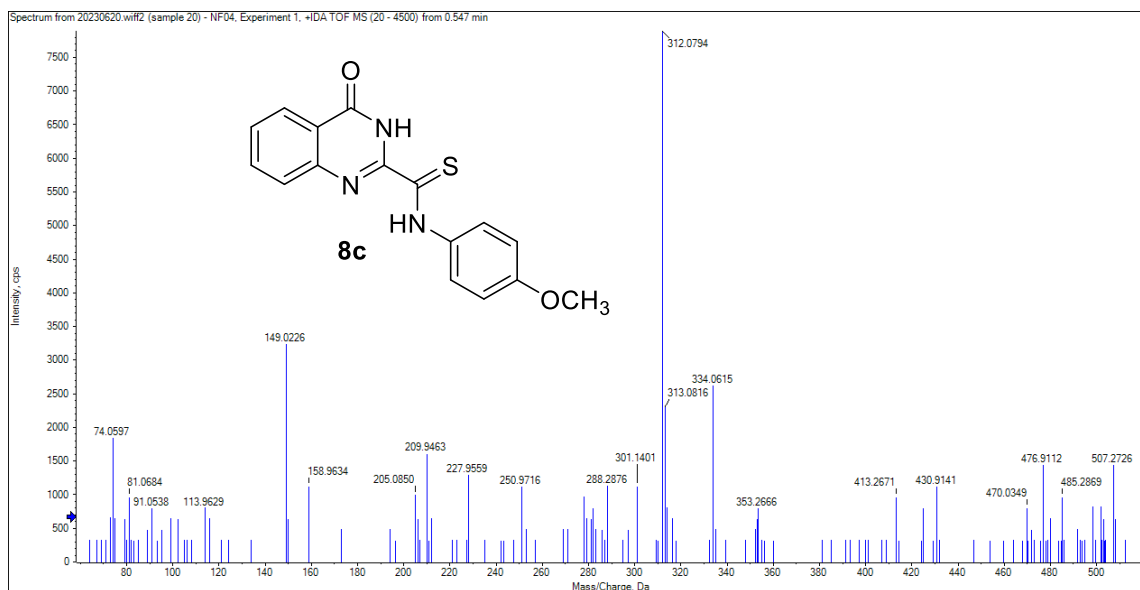

IR of spectra compound **8d**

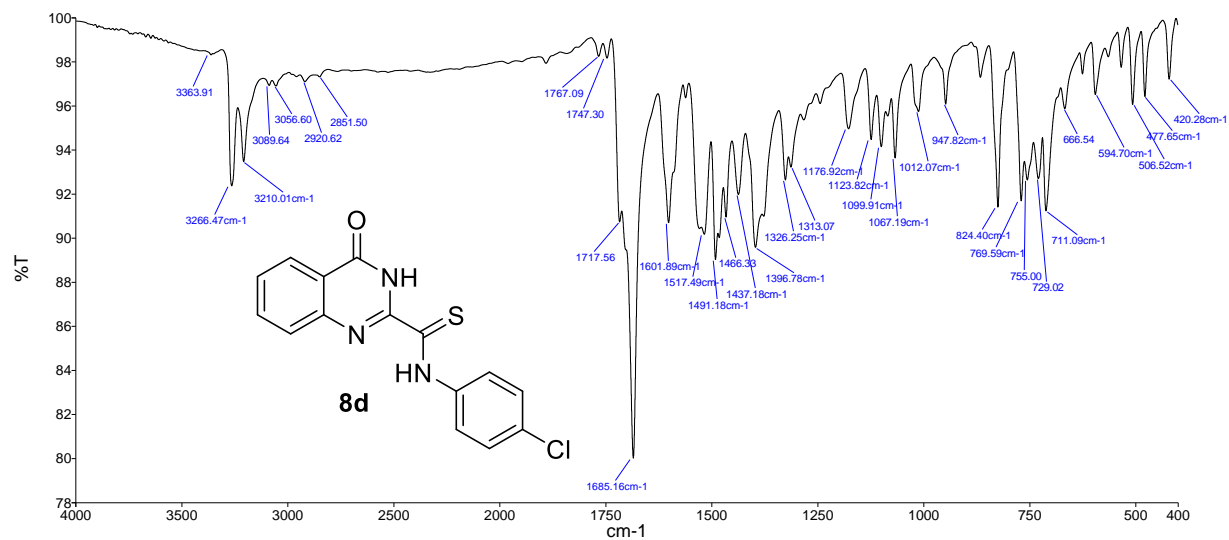

$^1\text{H}$  NMR ( $\text{CDCl}_3$ , 600 MHz) spectrum of compound **8d**

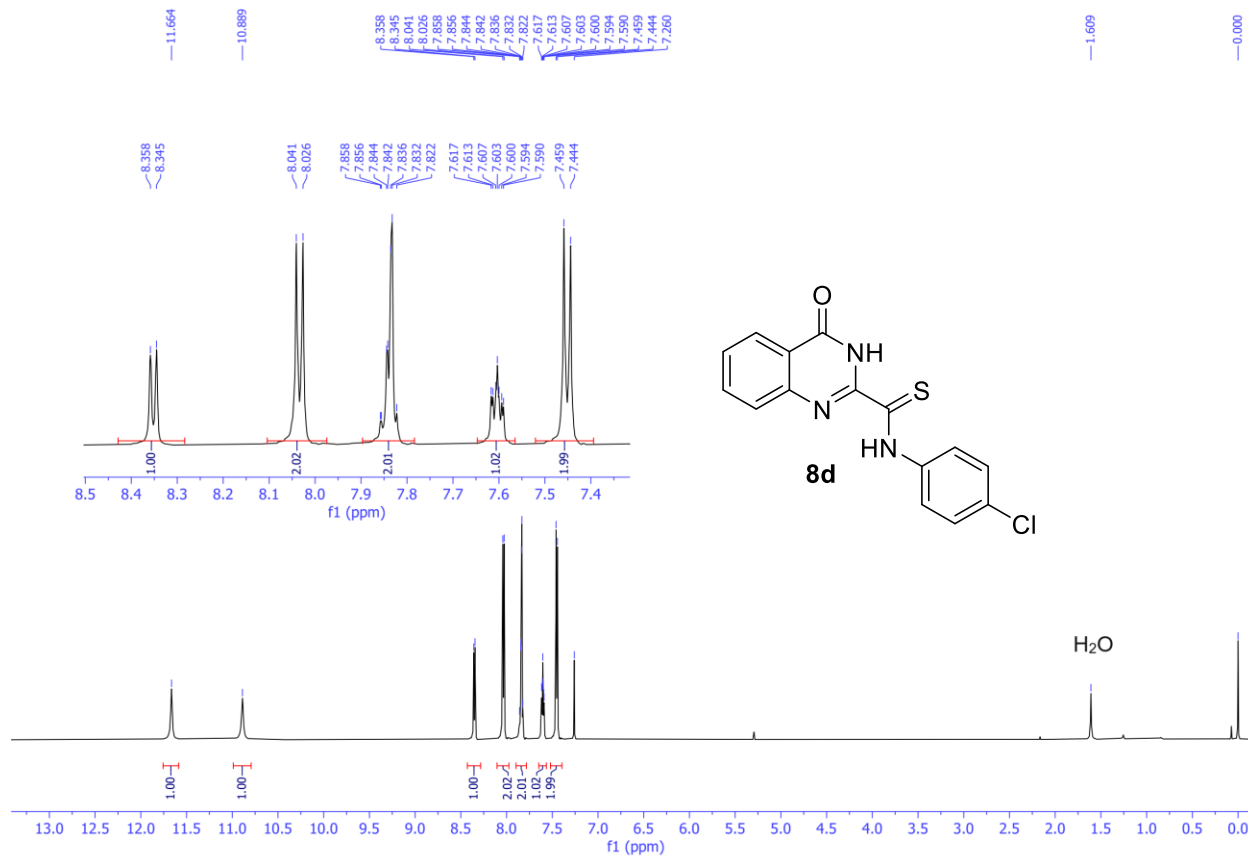

$^{13}\text{C}$  NMR ( $\text{CDCl}_3$ , 150 MHz) spectrum of compound **8d**

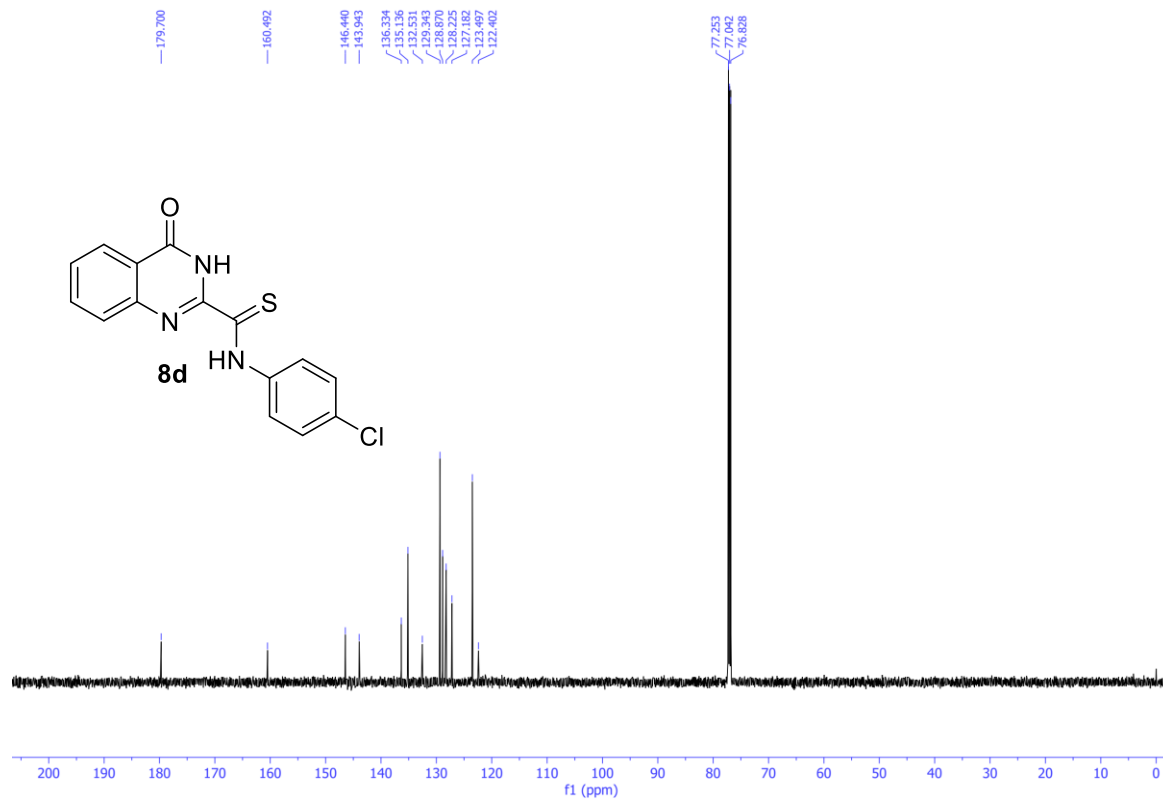

HRMS spectrum of compound **8d**

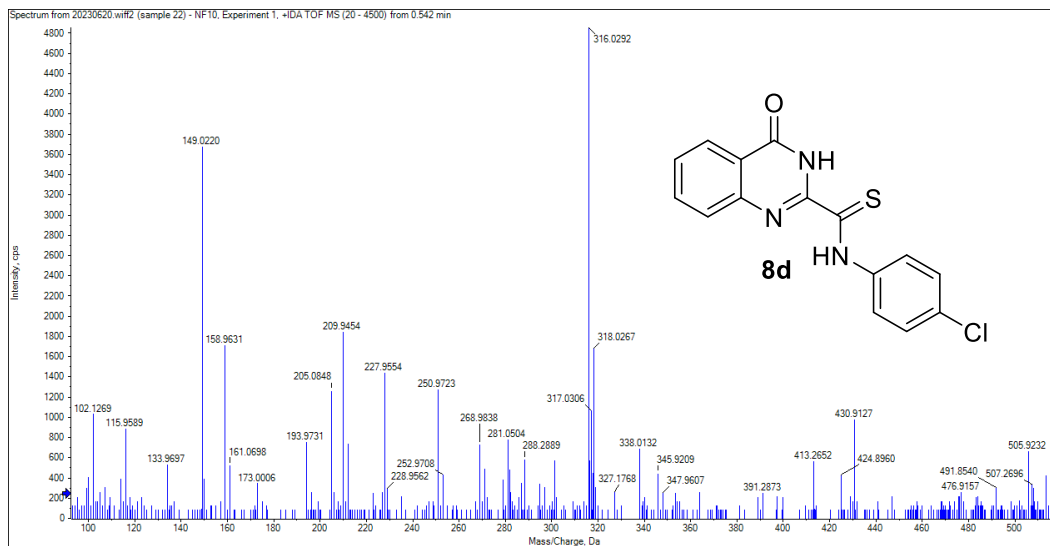

## HPLC analysis of compound **8d**

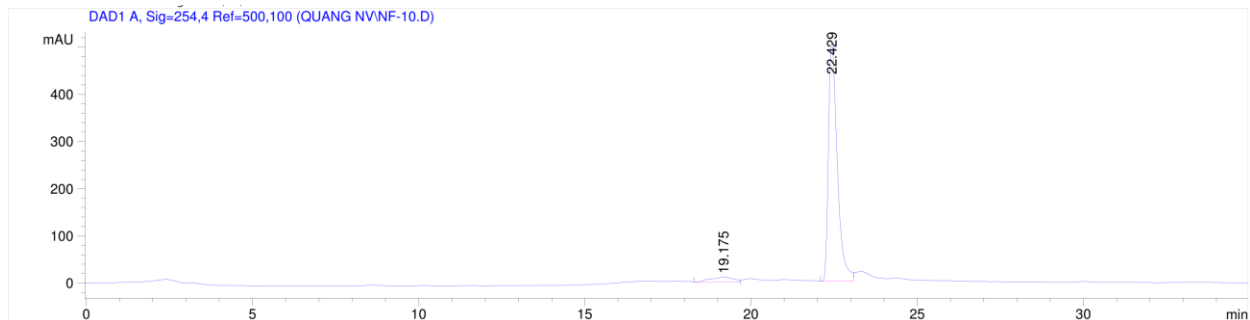

## IR of spectra compound **8e**

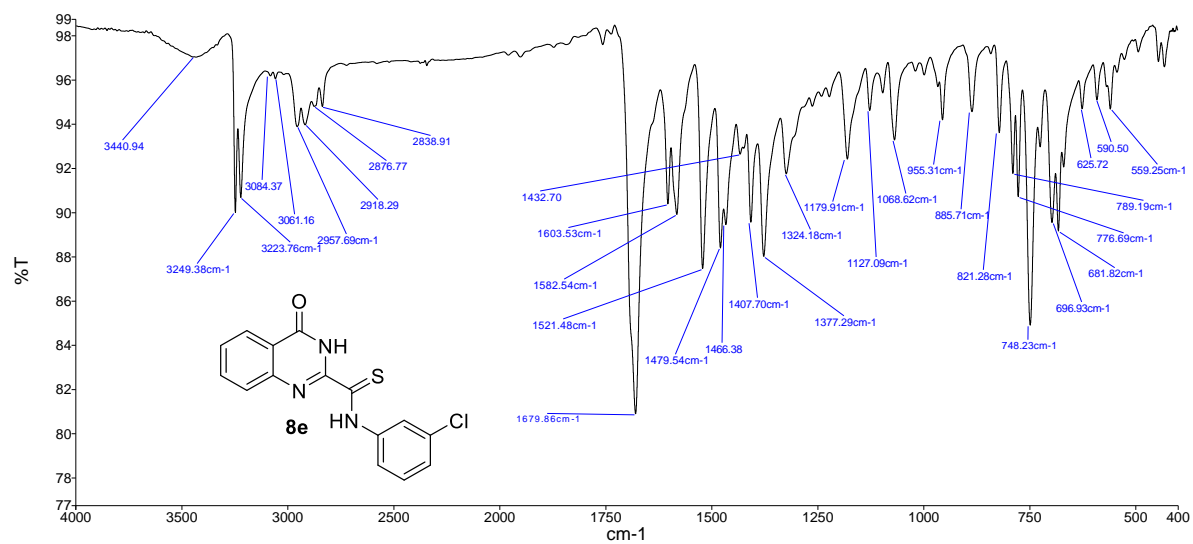

<sup>1</sup>H NMR (CDCl<sub>3</sub>, 600 MHz) spectrum of compound **8e**

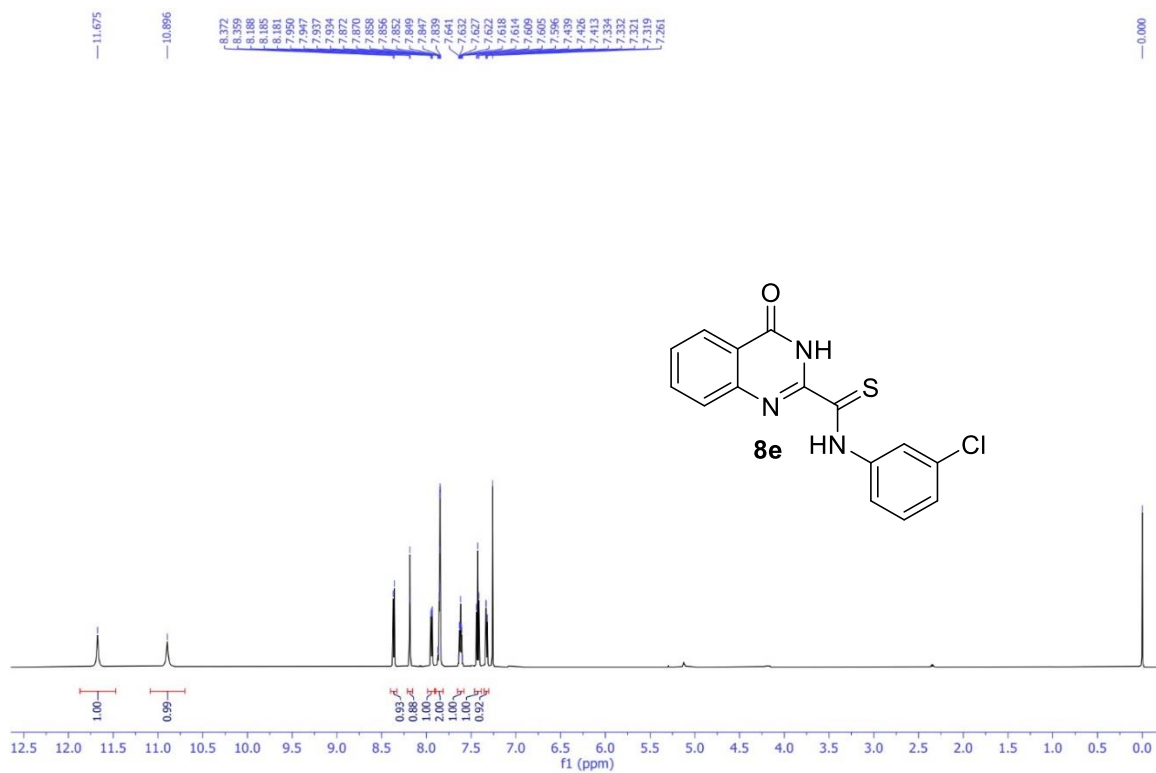

<sup>13</sup>C NMR (CDCl<sub>3</sub>, 600 MHz) spectrum of compound **8e**

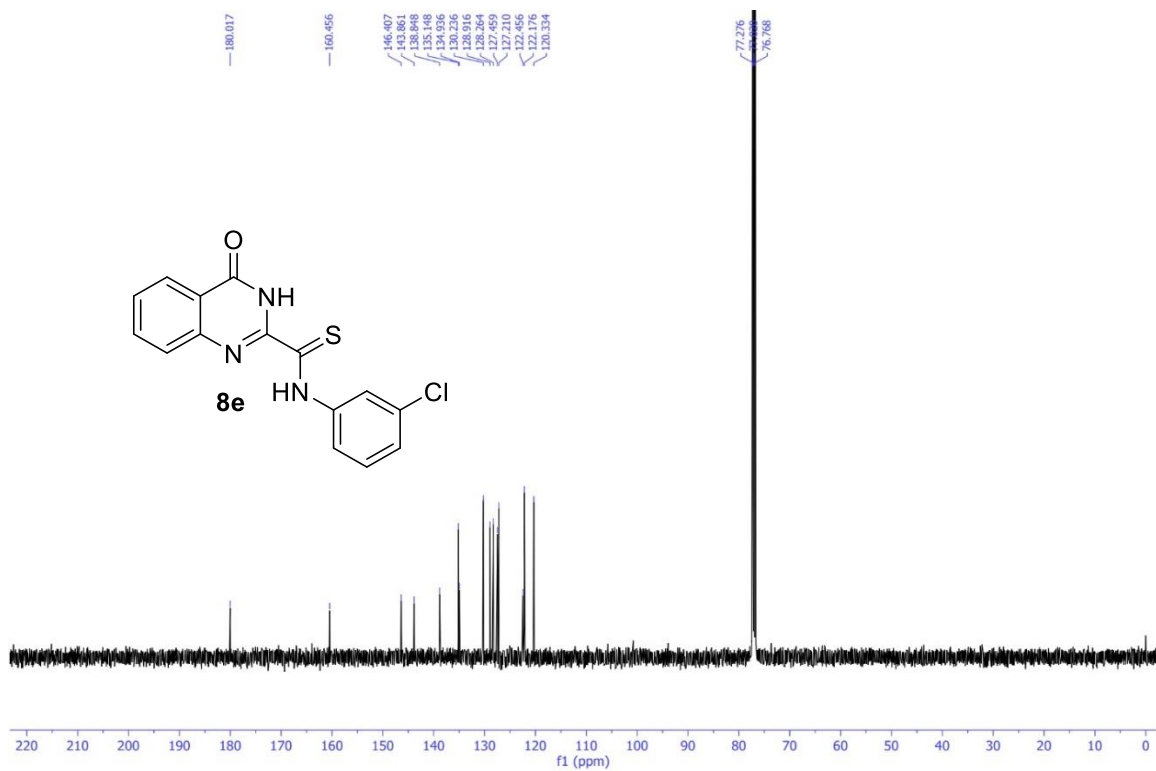

## HRMS spectrum of compound **8e**

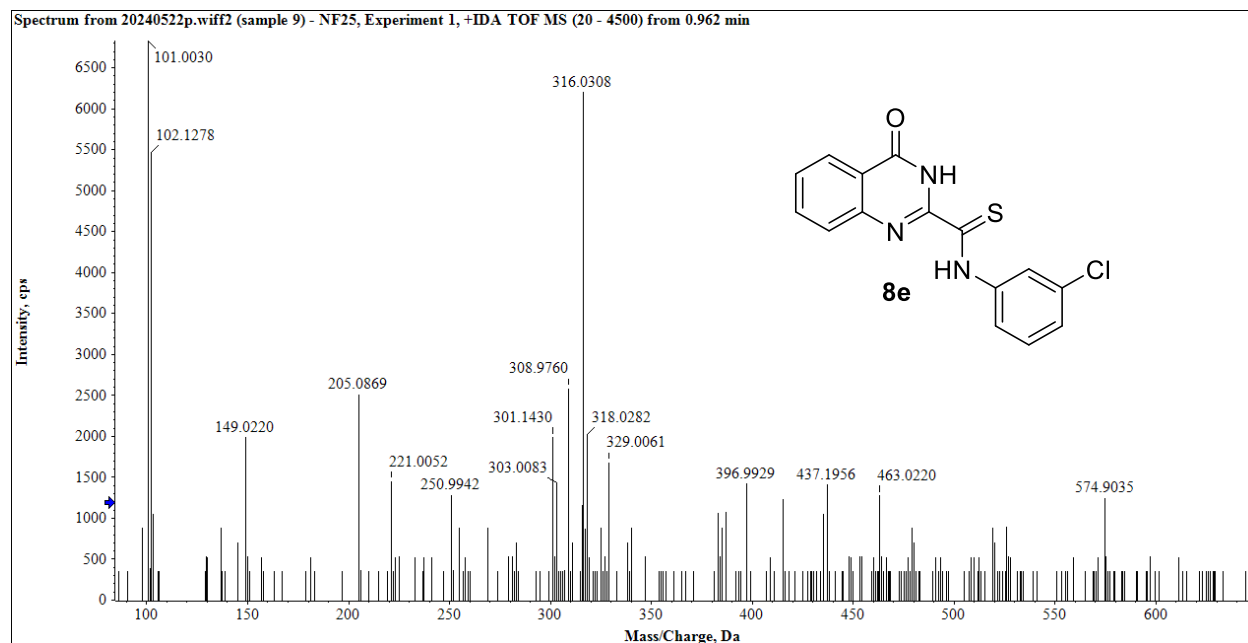

## IR of spectra compound **8f**

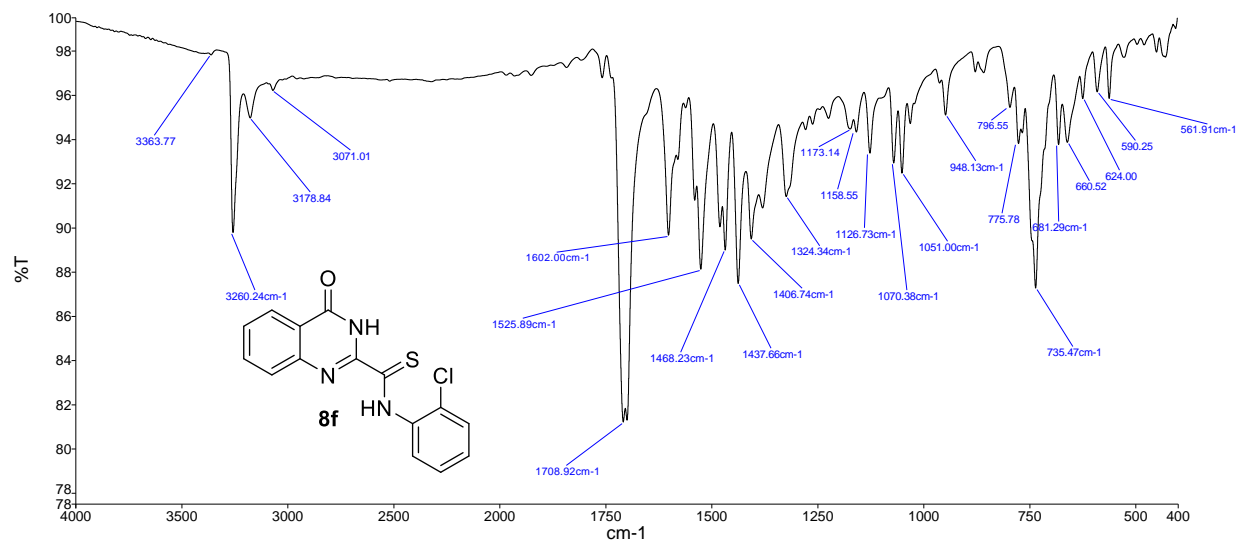

<sup>1</sup>H NMR (CDCl<sub>3</sub>, 600 MHz) spectrum of compound **8f**

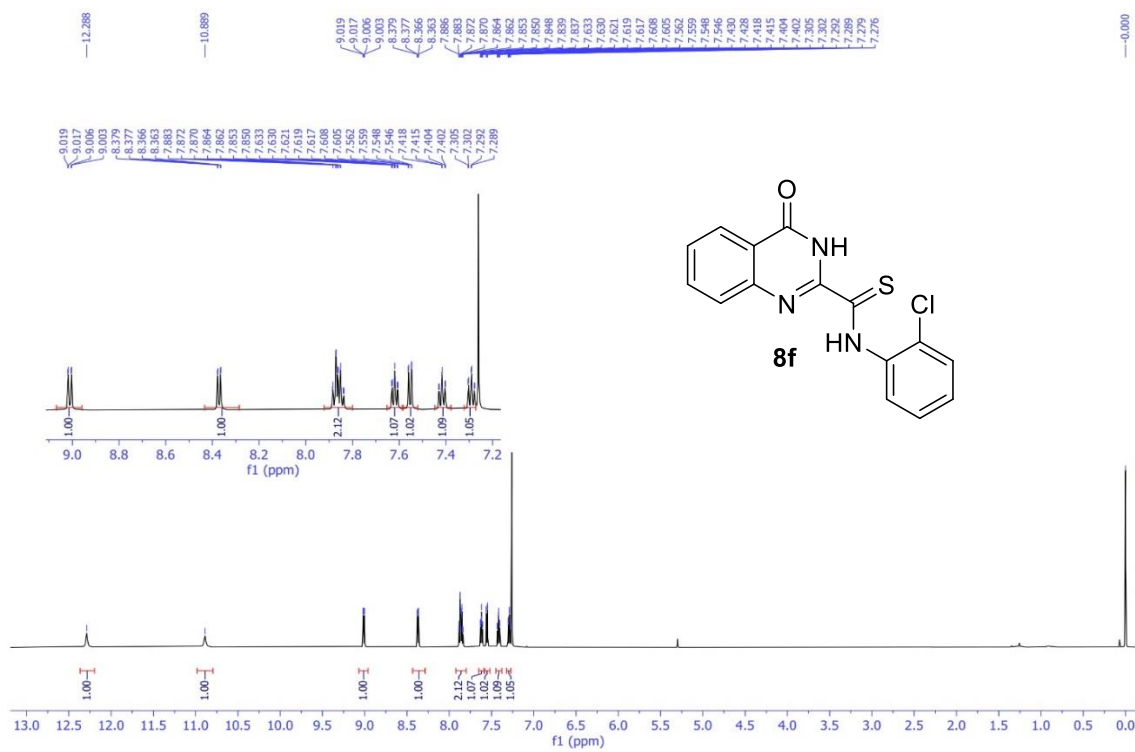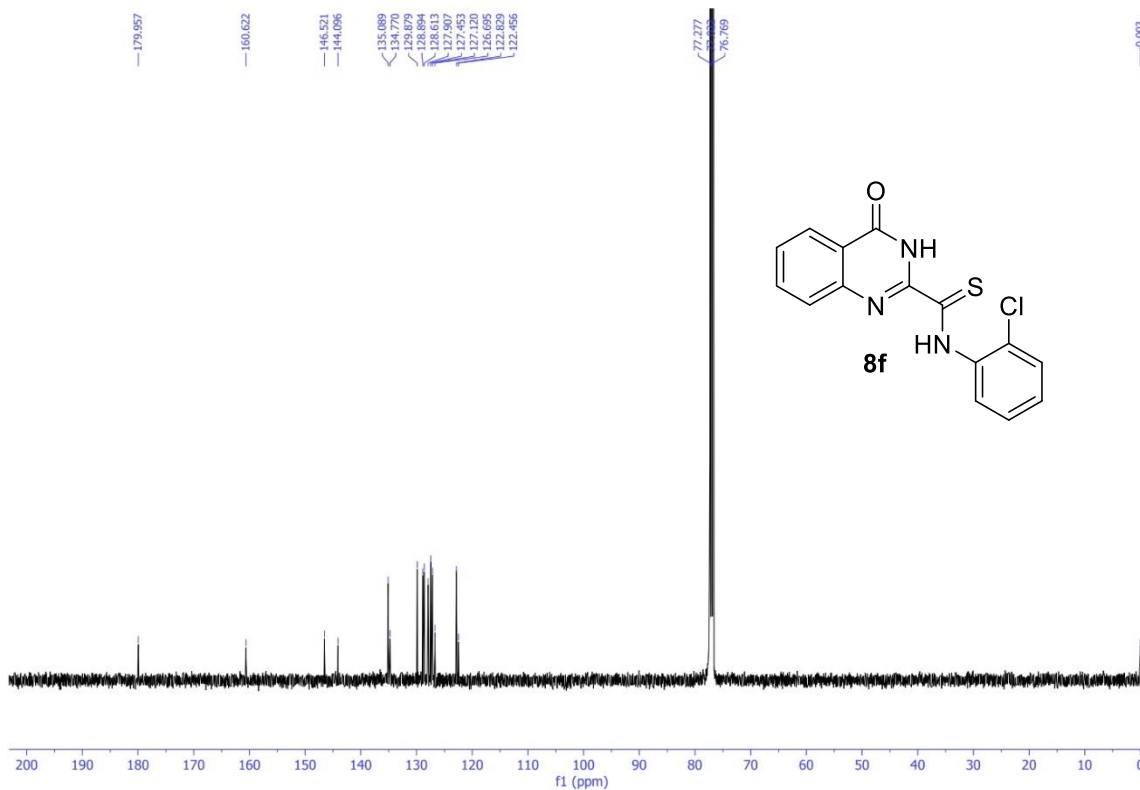

## HRMS spectrum of compound **8f**

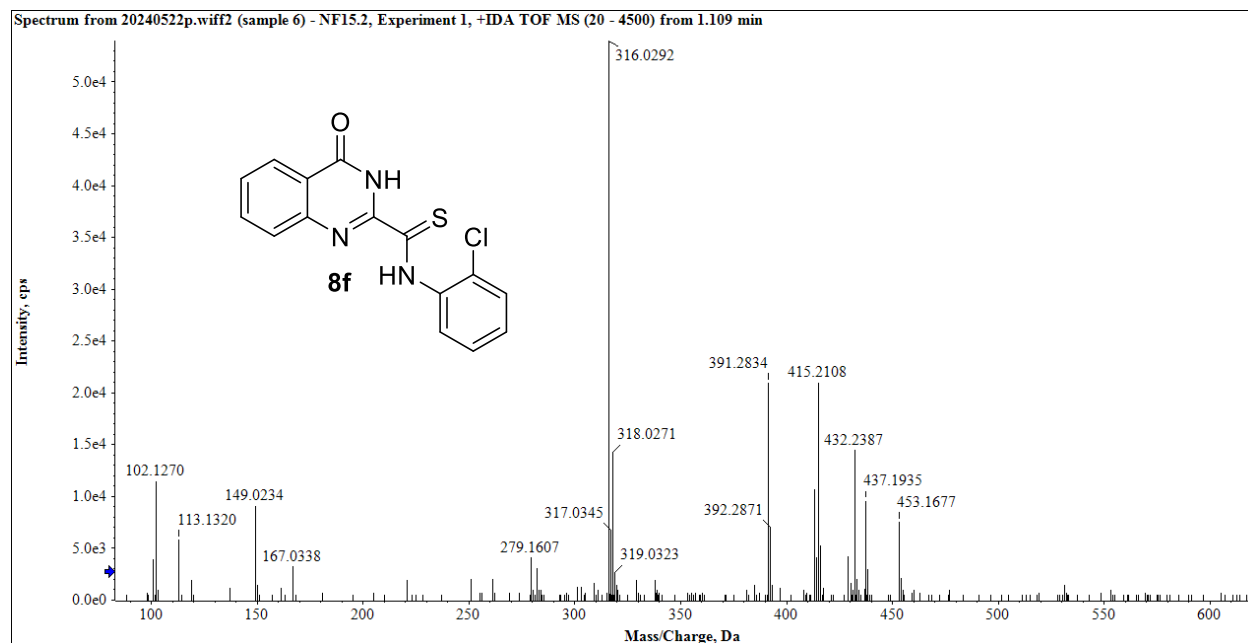

## IR of spectra compound **8g**

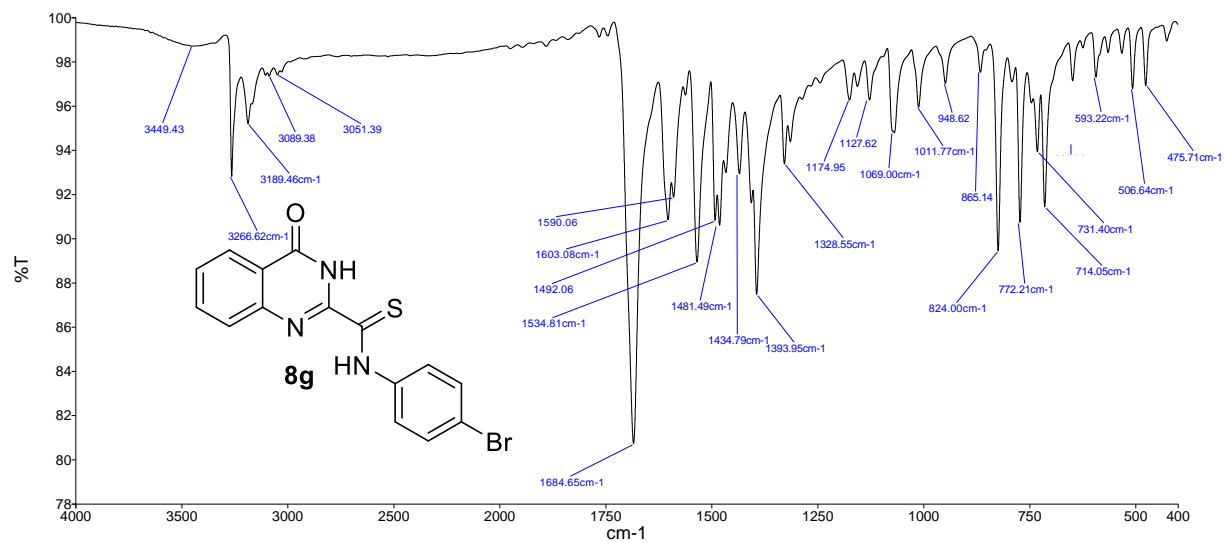





## HRMS spectrum of compound **8g**

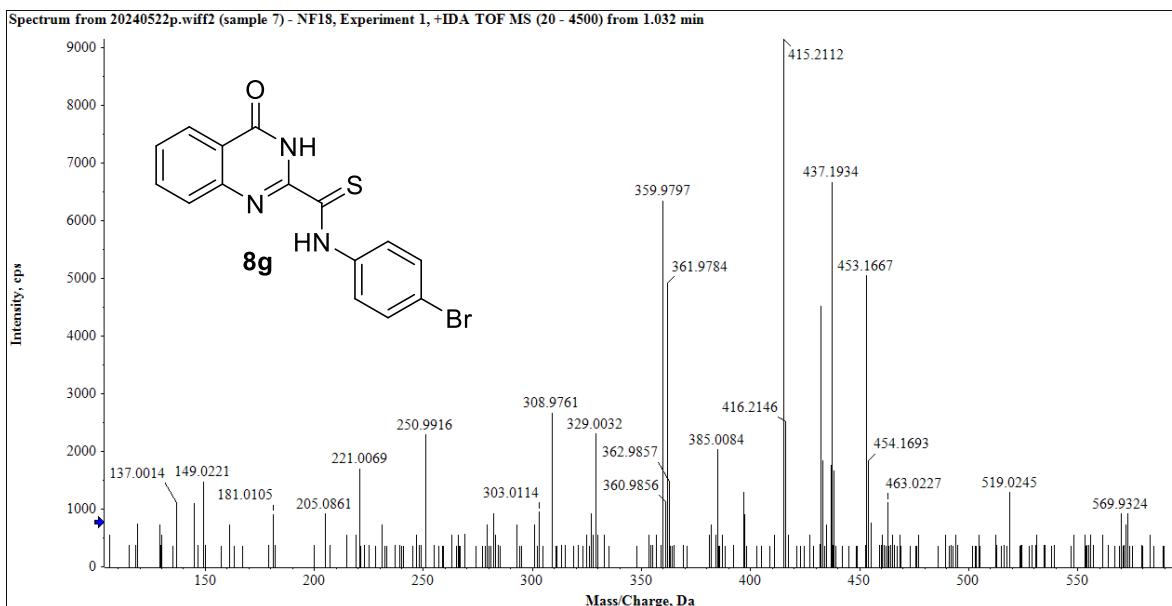

## HPLC analysis of compound **8g**

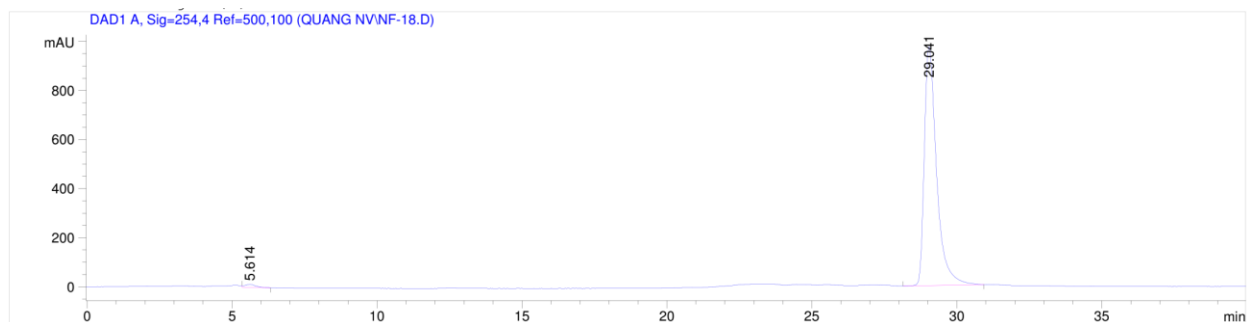

## IR of spectra compound **8h**

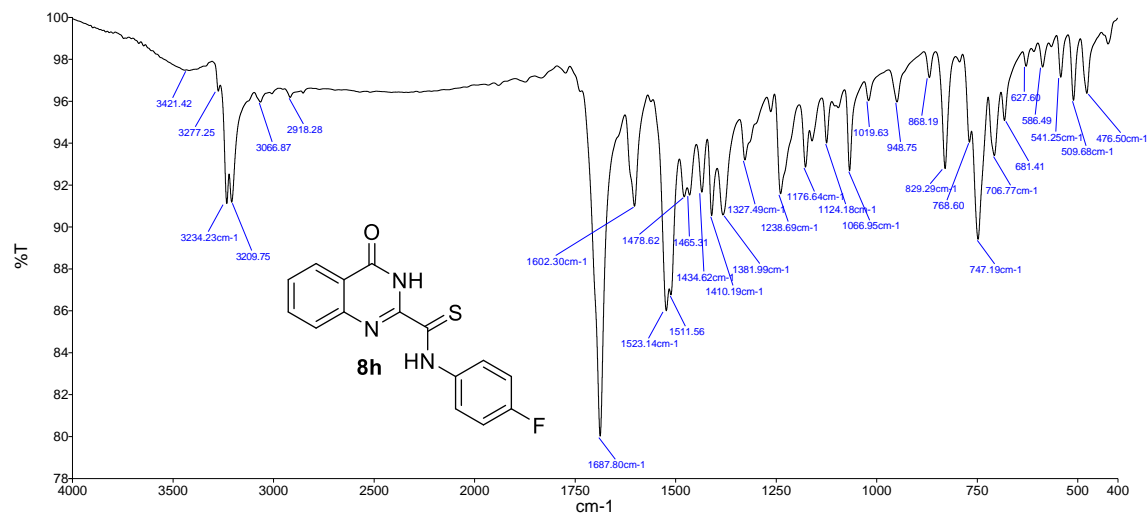

<sup>1</sup>H NMR (CDCl<sub>3</sub>, 600 MHz) spectrum of **8h**

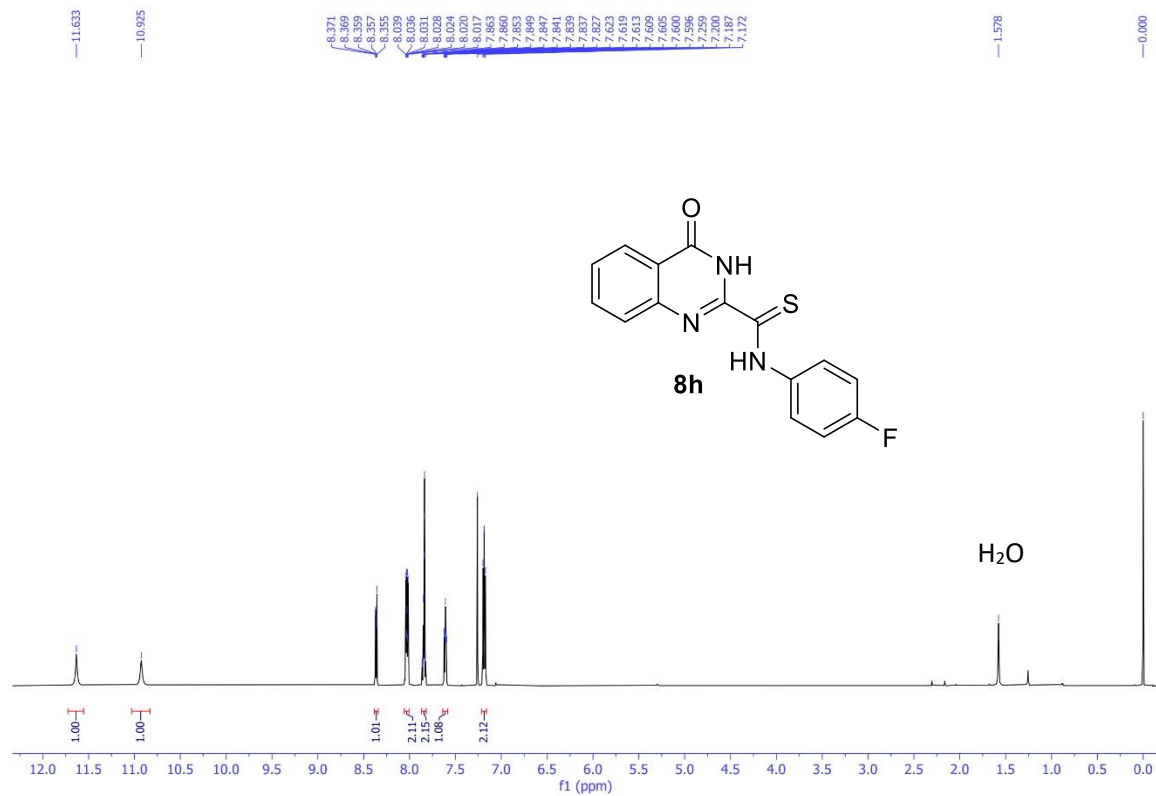

<sup>13</sup>C NMR (CDCl<sub>3</sub>, 150 MHz) spectrum of compound **8h**

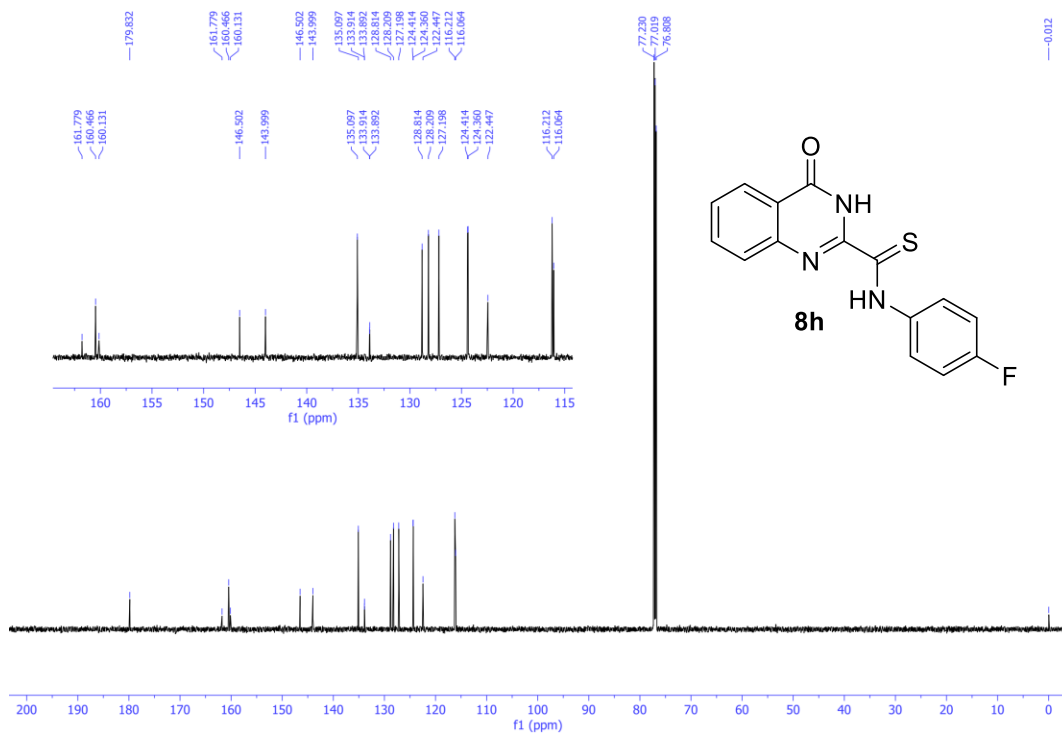

## HRMS spectrum of compound **8h**

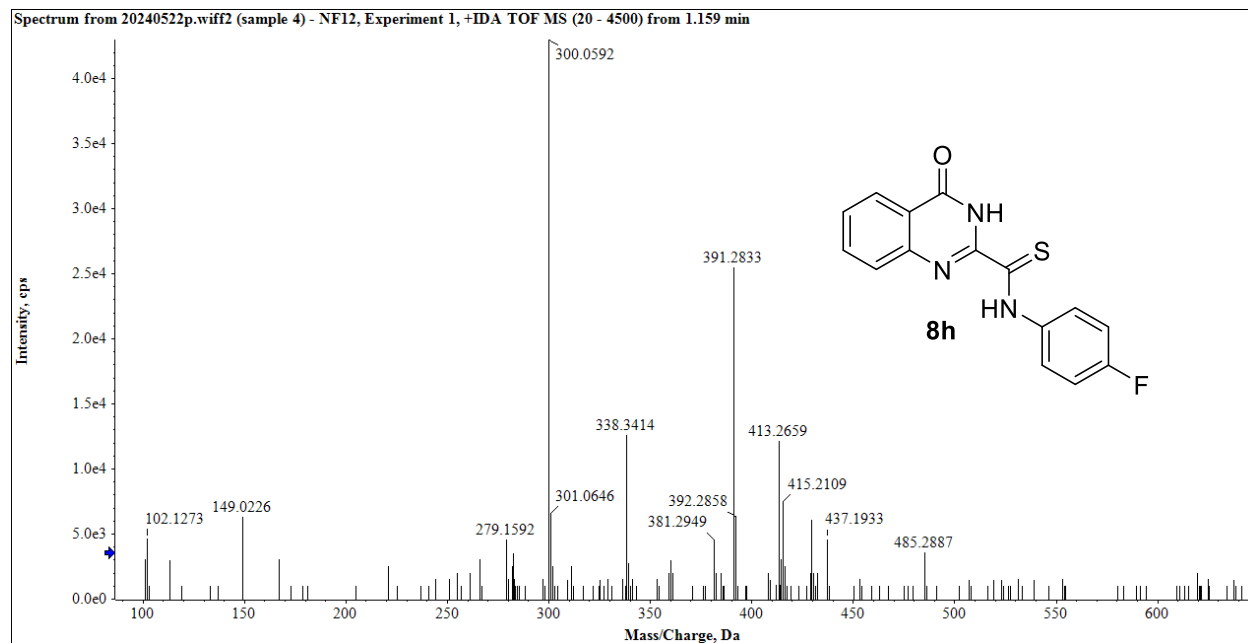

## IR of spectra compound **8i**

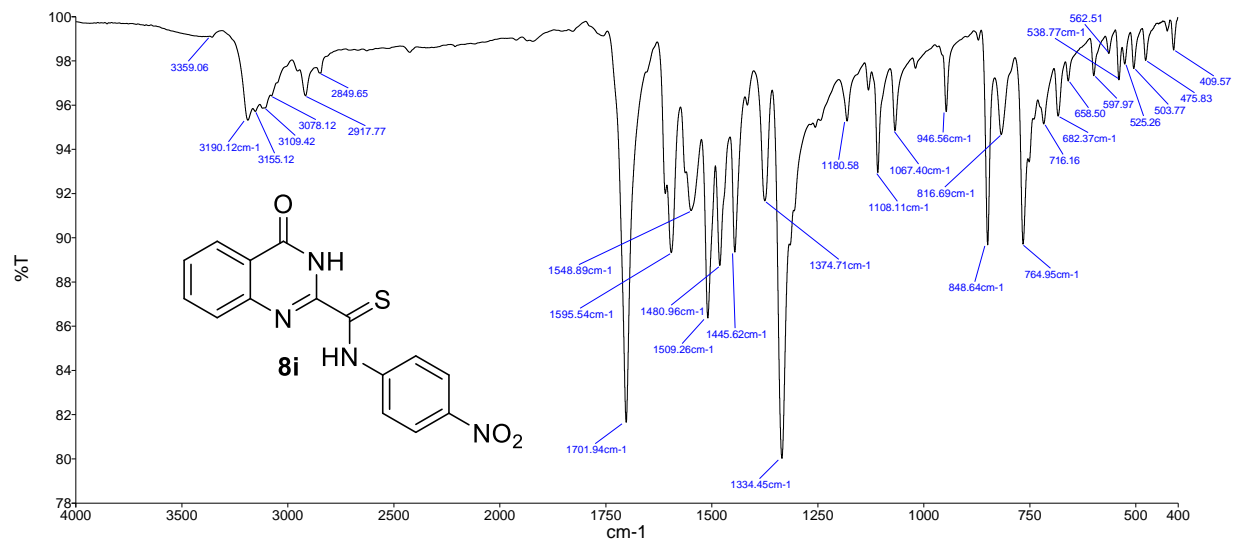

<sup>1</sup>H NMR (CDCl<sub>3</sub>, 600 MHz) spectrum of compound **8i**

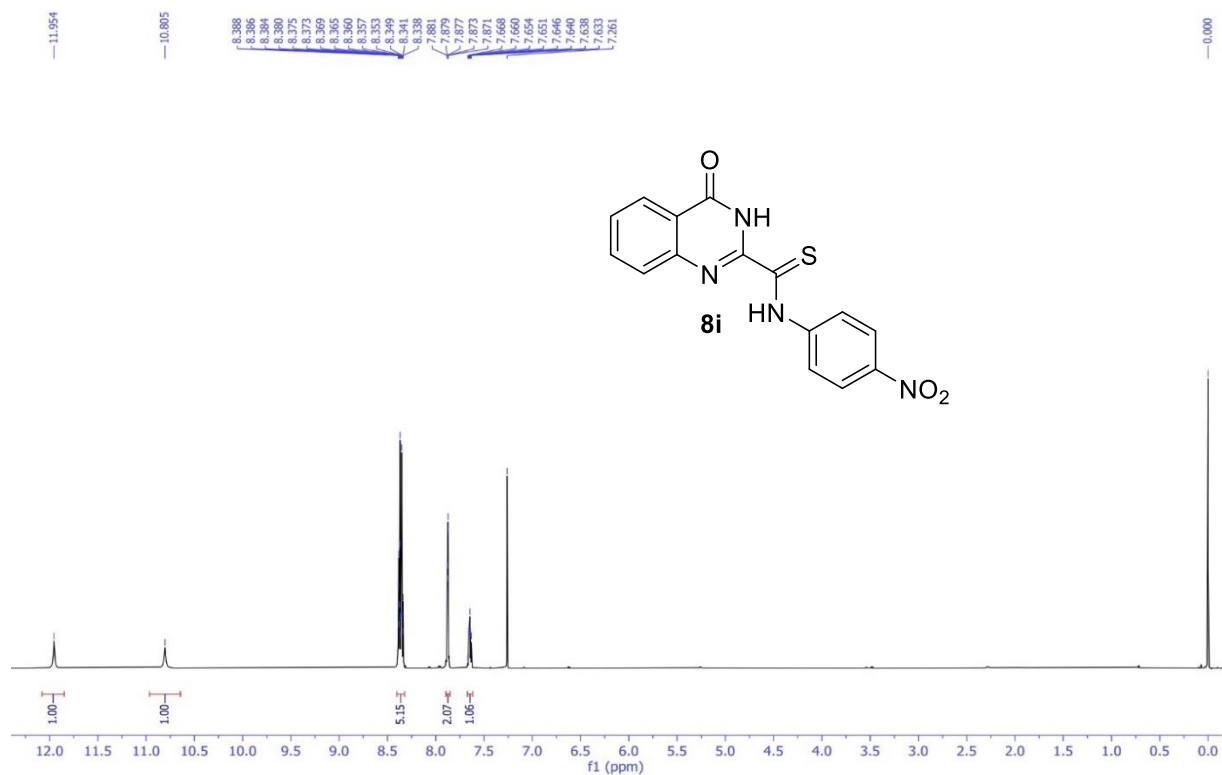

<sup>13</sup>C NMR (CDCl<sub>3</sub>, 125 MHz) spectrum of compound **8i**

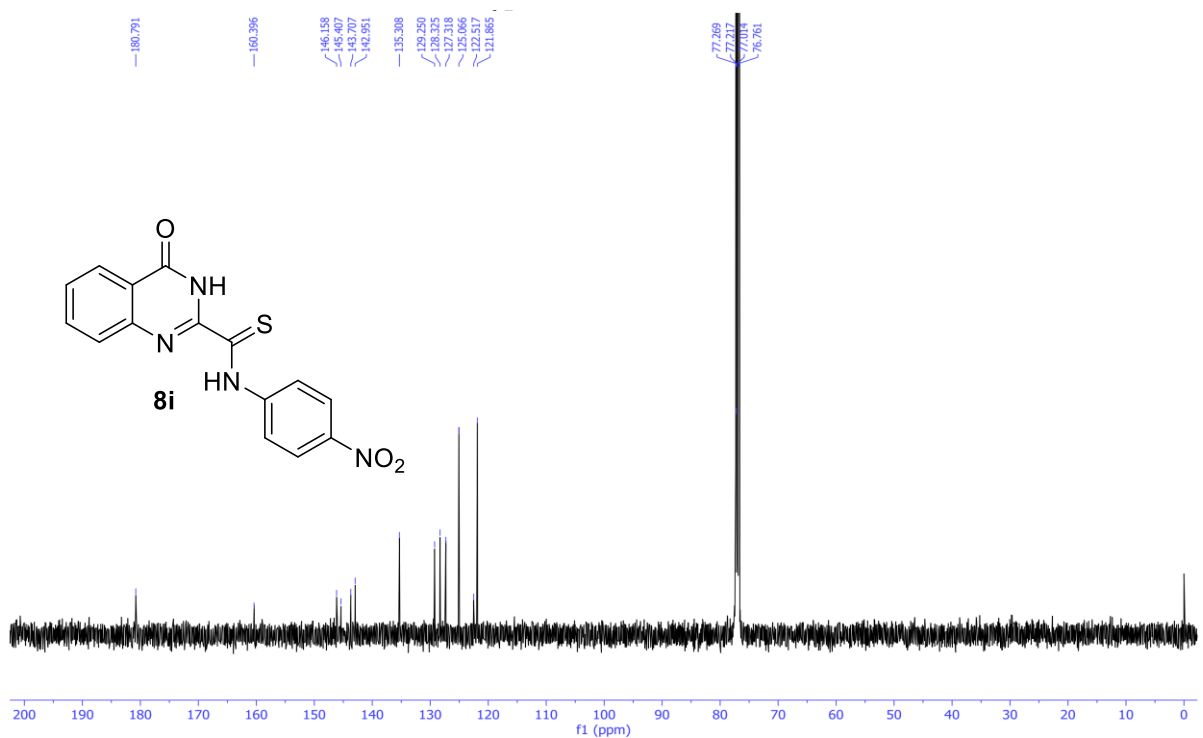

## HRMS spectrum of compound **8i**

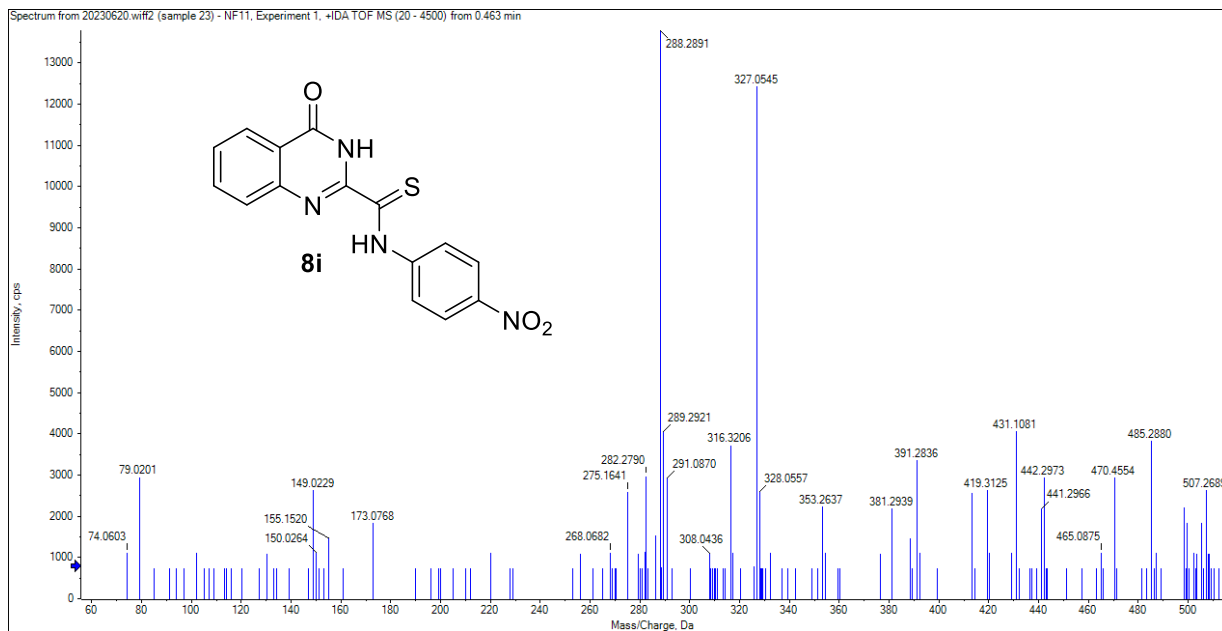

## IR of spectra compound **8k**

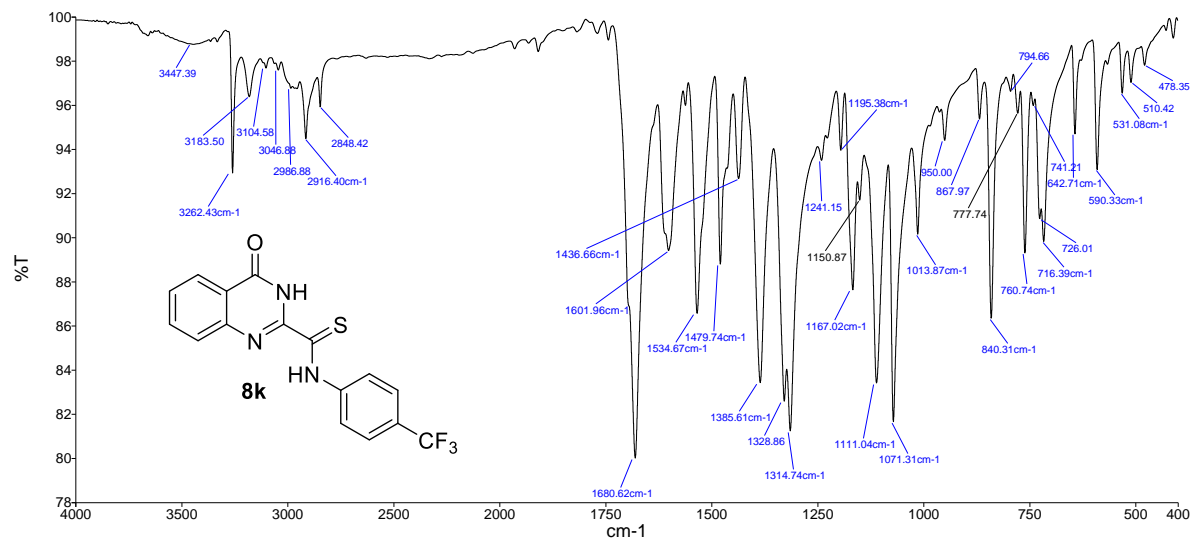

<sup>1</sup>H NMR (CDCl<sub>3</sub>, 600 MHz) spectrum of compound **8k**

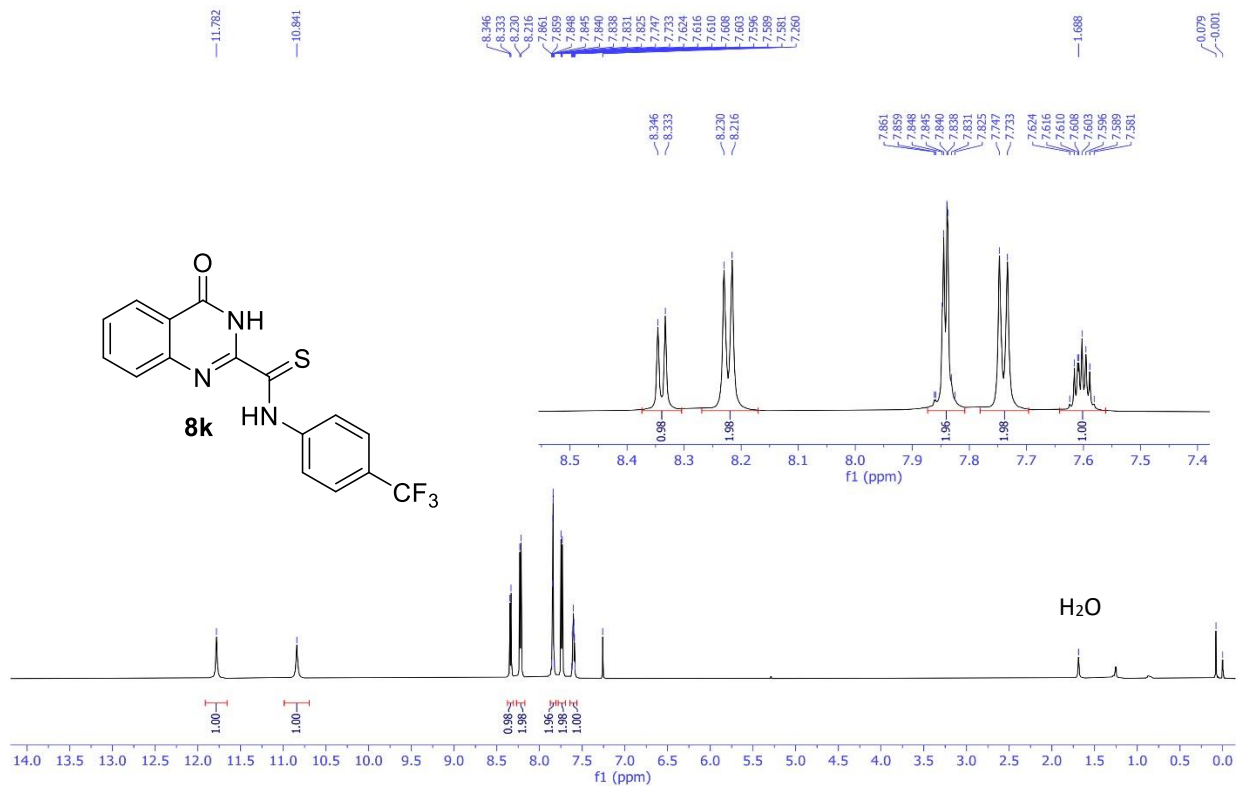

<sup>13</sup>C NMR (CDCl<sub>3</sub>, 150 MHz) spectrum of compound **8k**

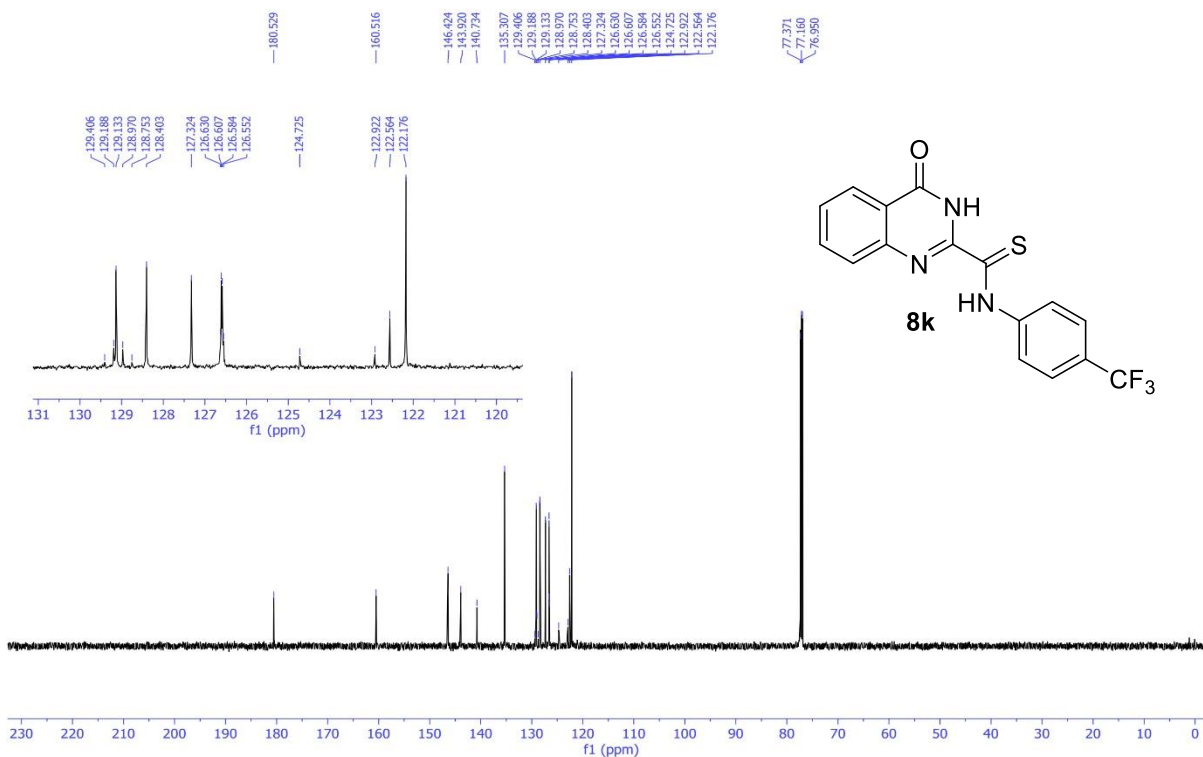

NOESY (CDCl<sub>3</sub>) spectrum of compound **8k**

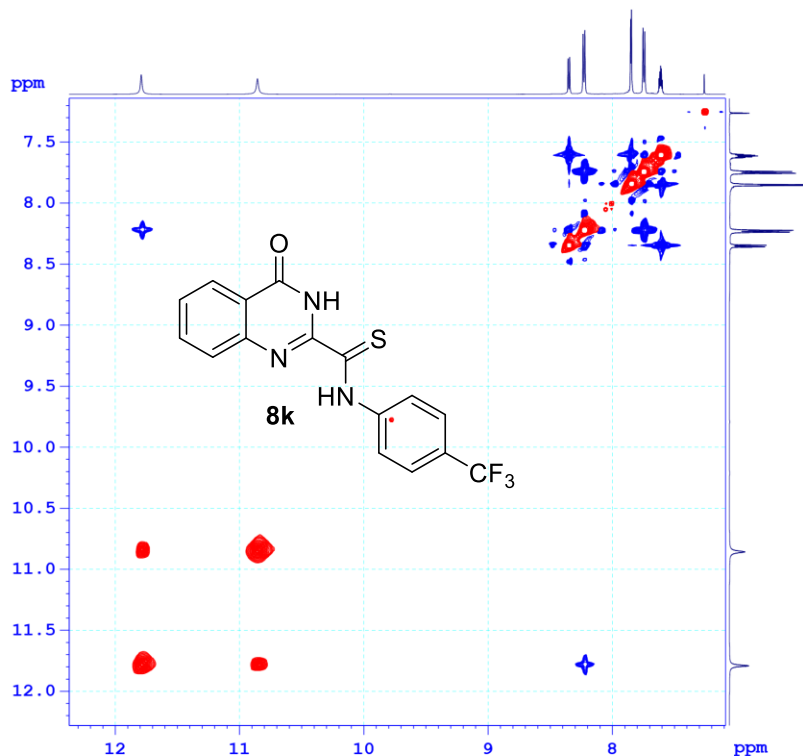

HRMS spectrum of compound **8k**

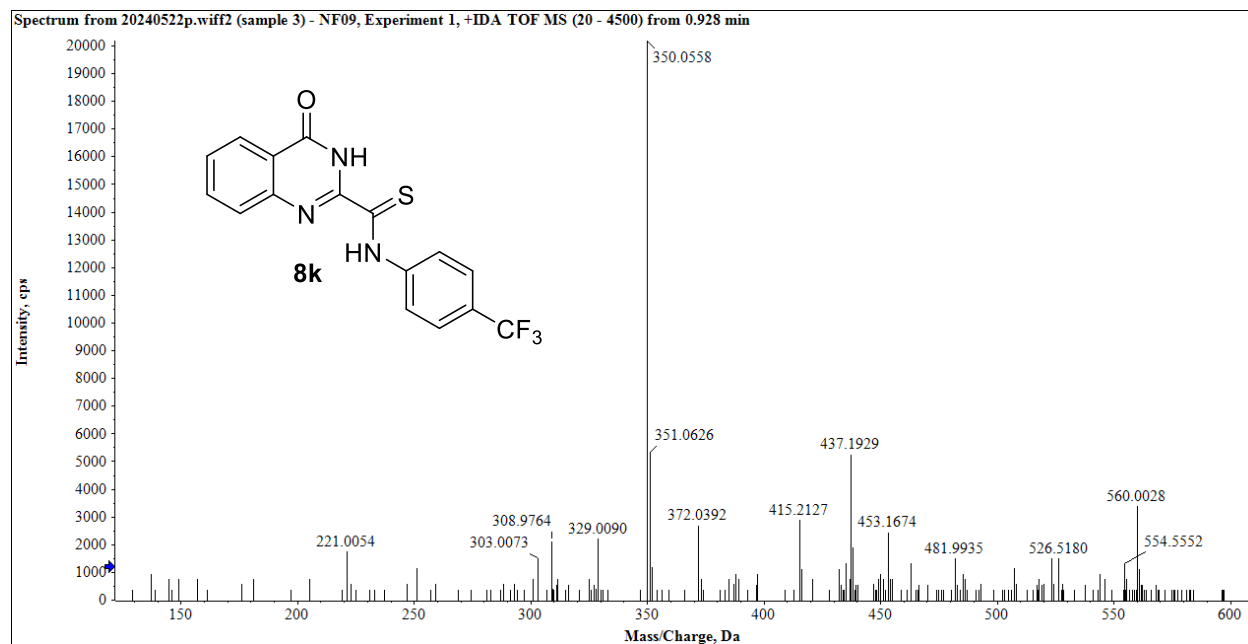



## HPLC analysis of compound **8k**

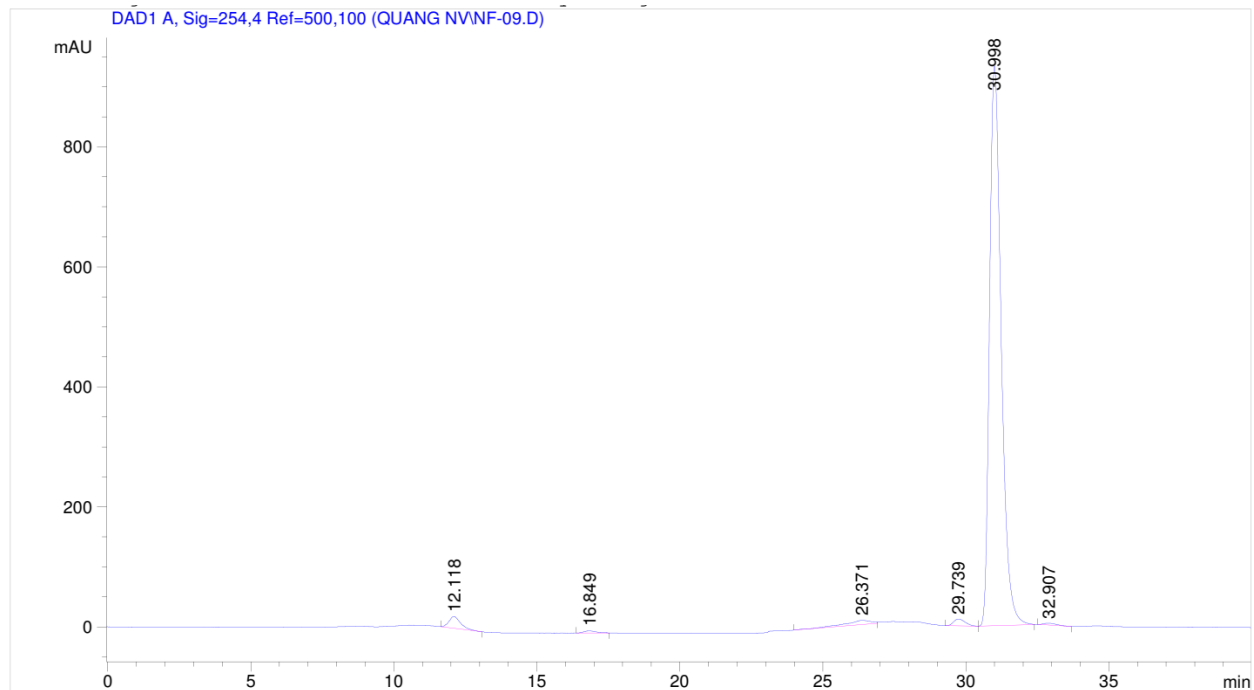

## IR of spectra compound **8l**

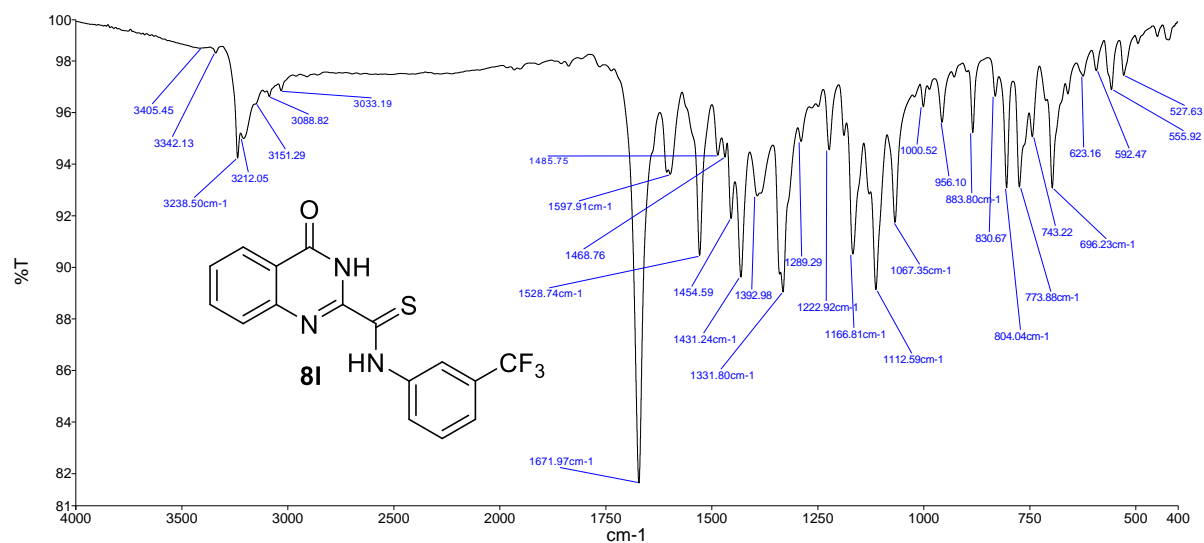

<sup>1</sup>H NMR (DMSO-*d*<sub>6</sub>, 600 MHz) spectrum of compound **8I**

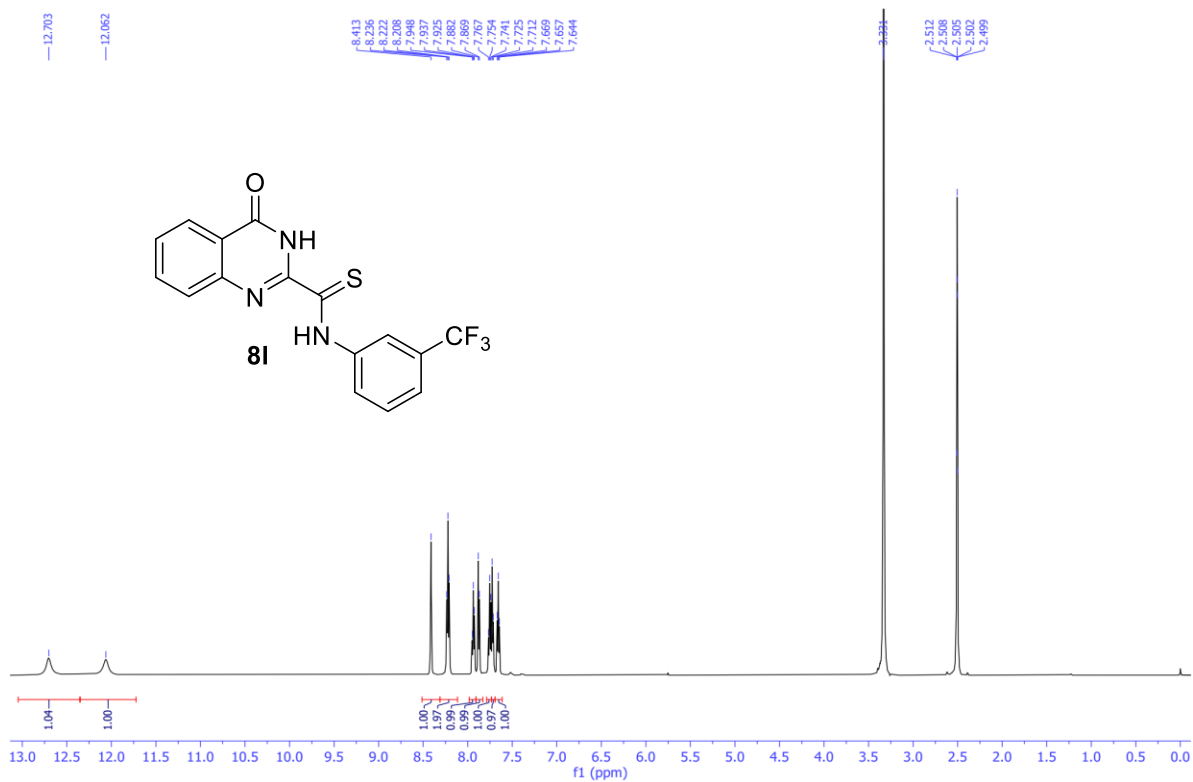

<sup>13</sup>C NMR (DMSO-*d*<sub>6</sub>, 150 MHz) spectrum of compound **8I**

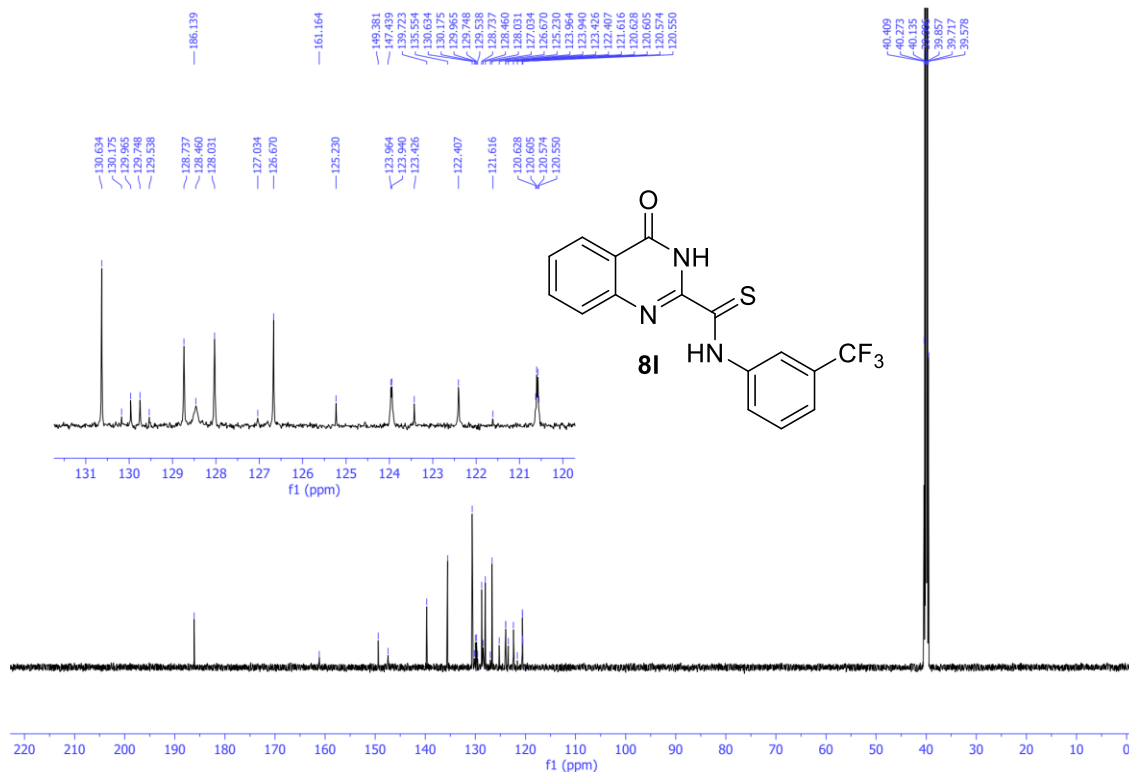

## HRMS spectrum of compound **8l**

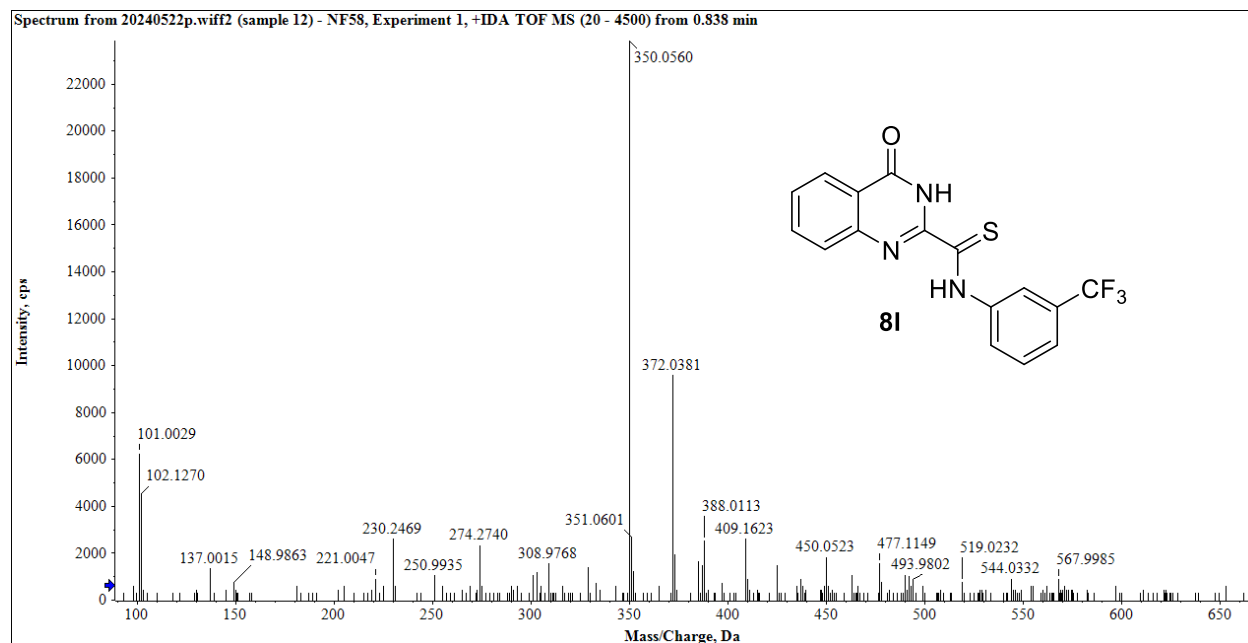

## IR of spectra compound **8m**

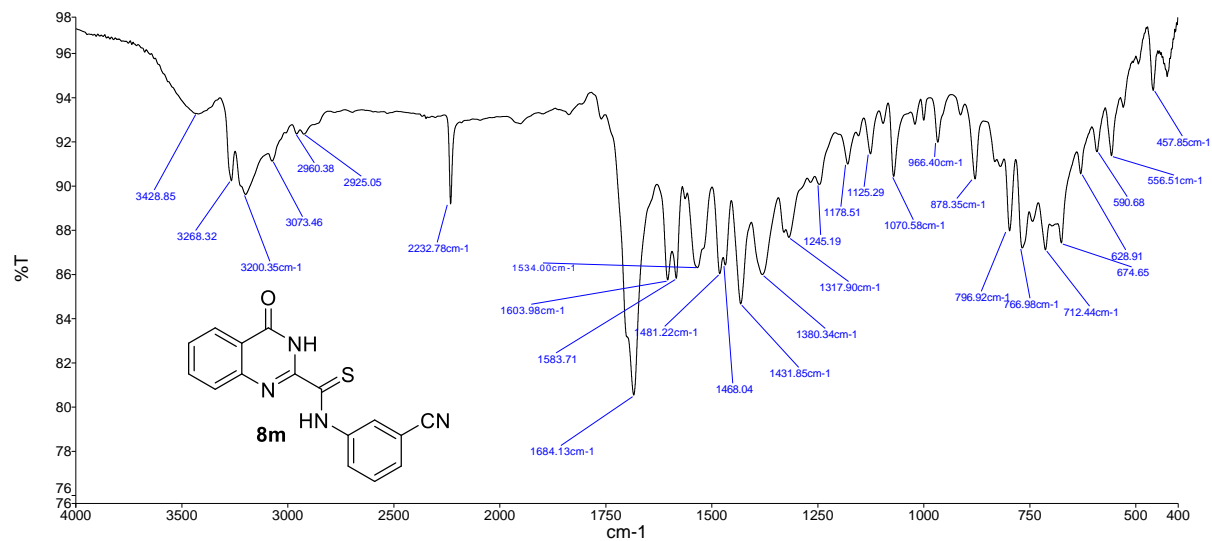

<sup>1</sup>H NMR (CDCl<sub>3</sub>, 600 MHz) spectrum of compound **8m**

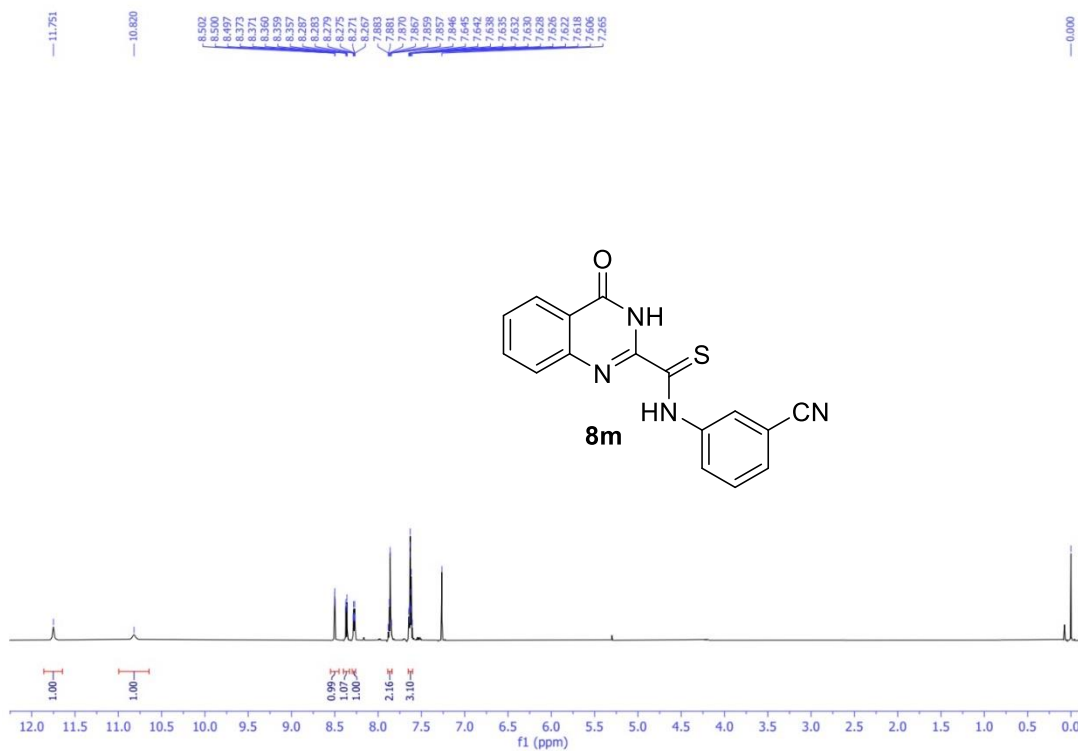

<sup>13</sup>C NMR (CDCl<sub>3</sub>, 125 MHz) spectrum of compound **8m**

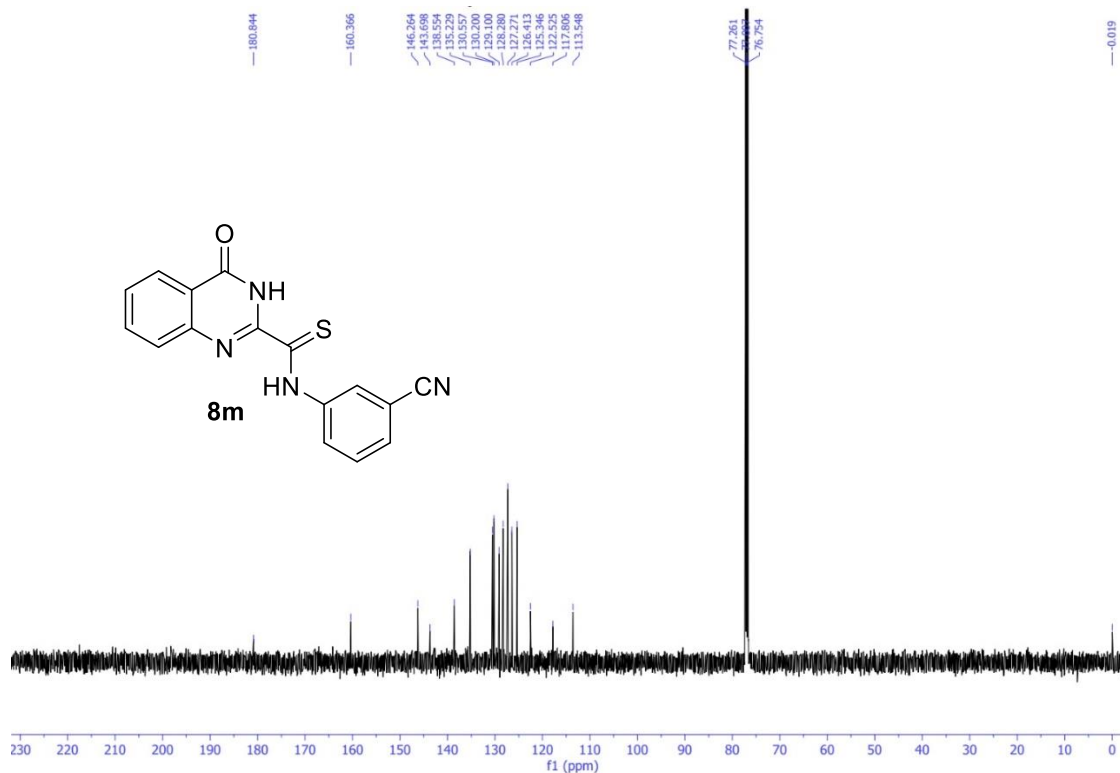

## HRMS spectrum of compound **8m**

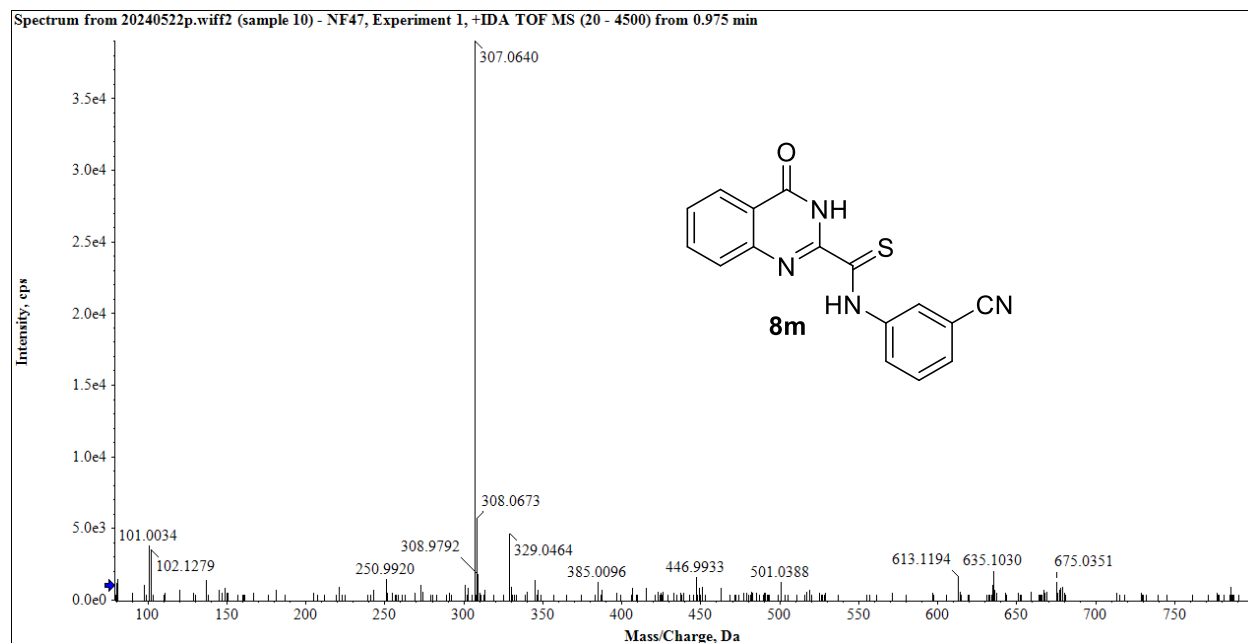

## IR of spectra compound **8n**

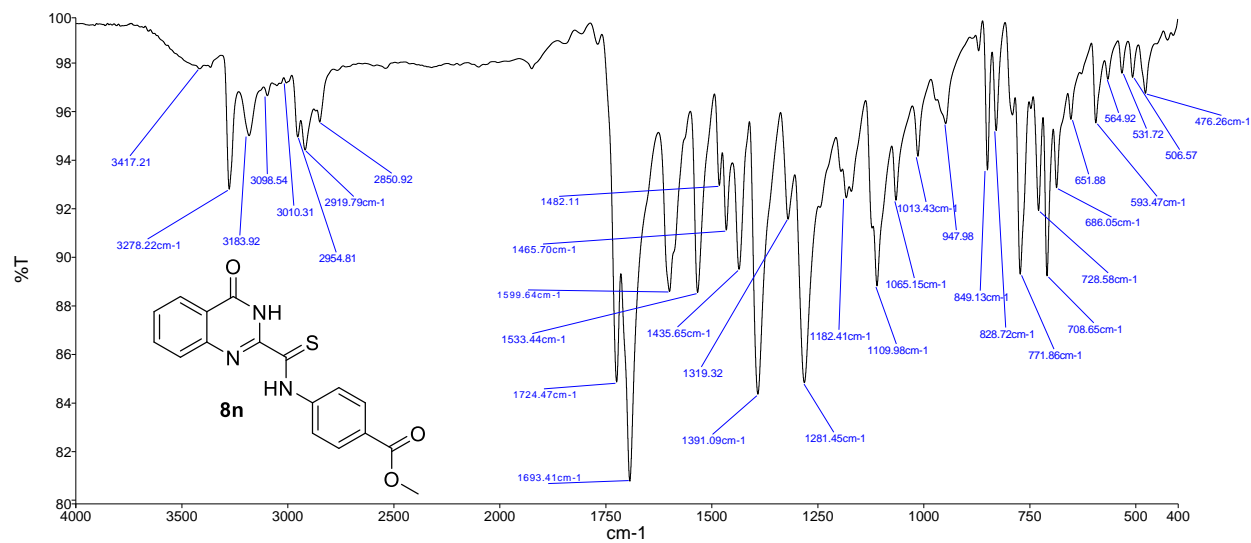

<sup>1</sup>H NMR (CDCl<sub>3</sub>, 600 MHz) spectrum of compound **8n**

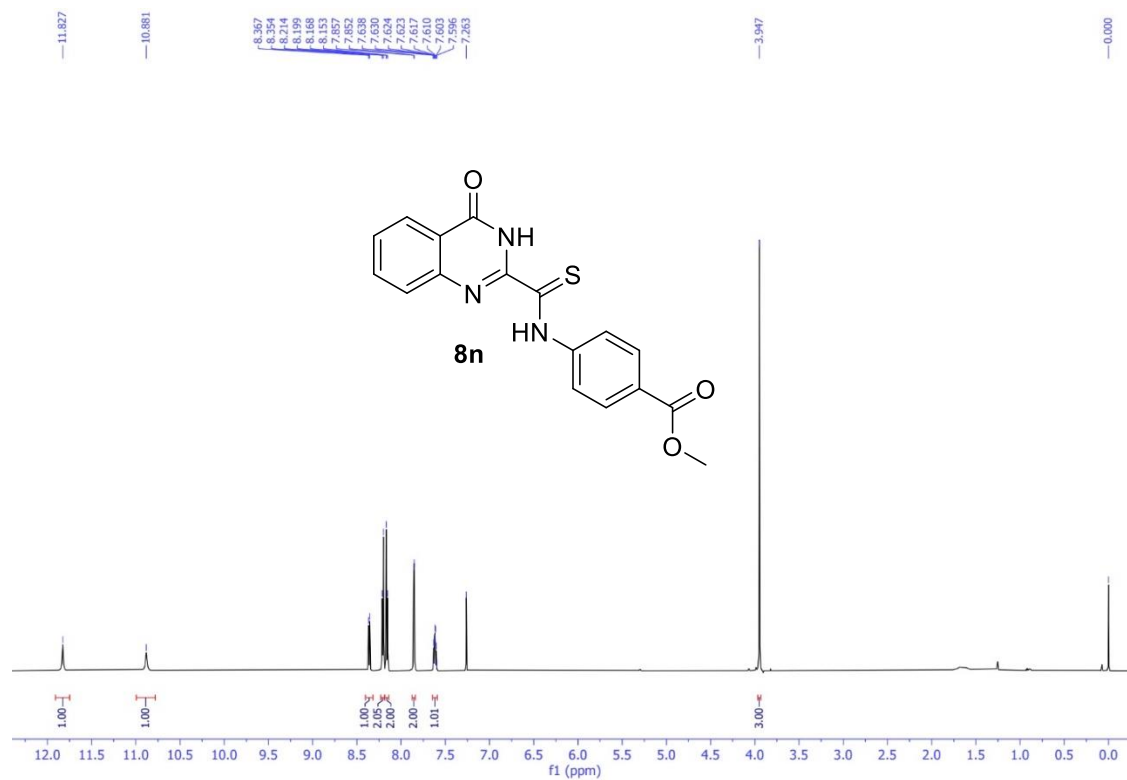

<sup>13</sup>C NMR (CDCl<sub>3</sub>, 125 MHz) spectrum of compound **8n**

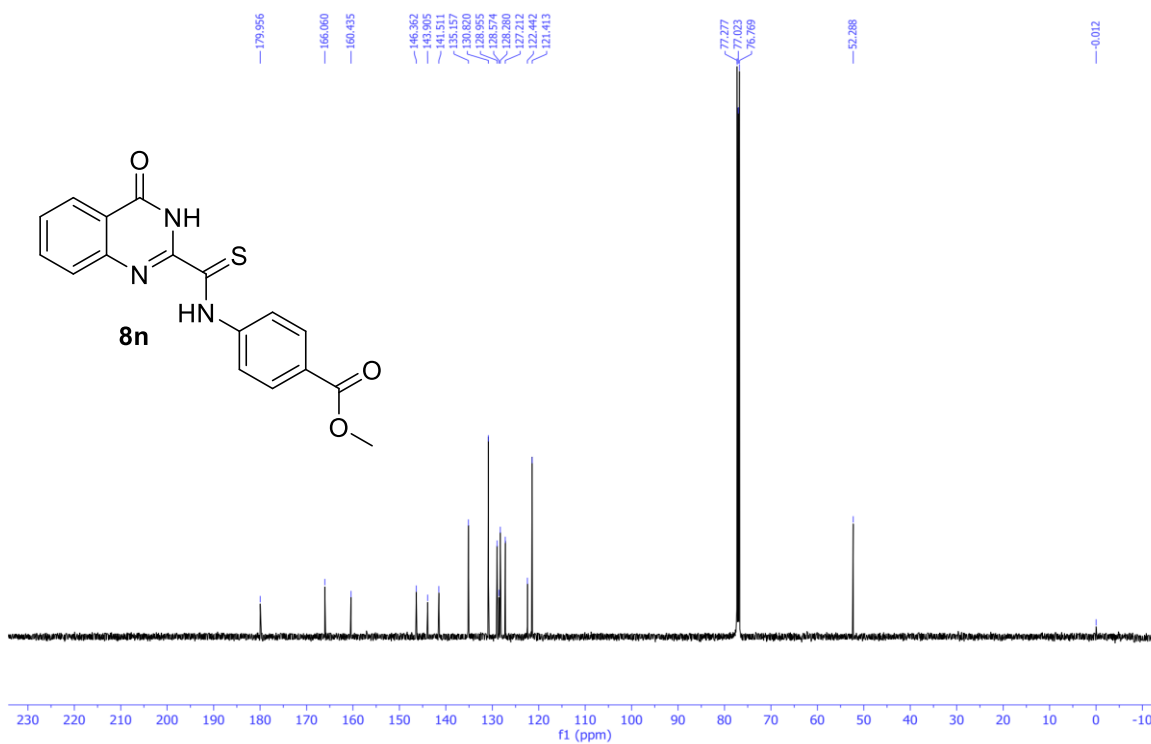

## HRMS spectrum of compound **8n**

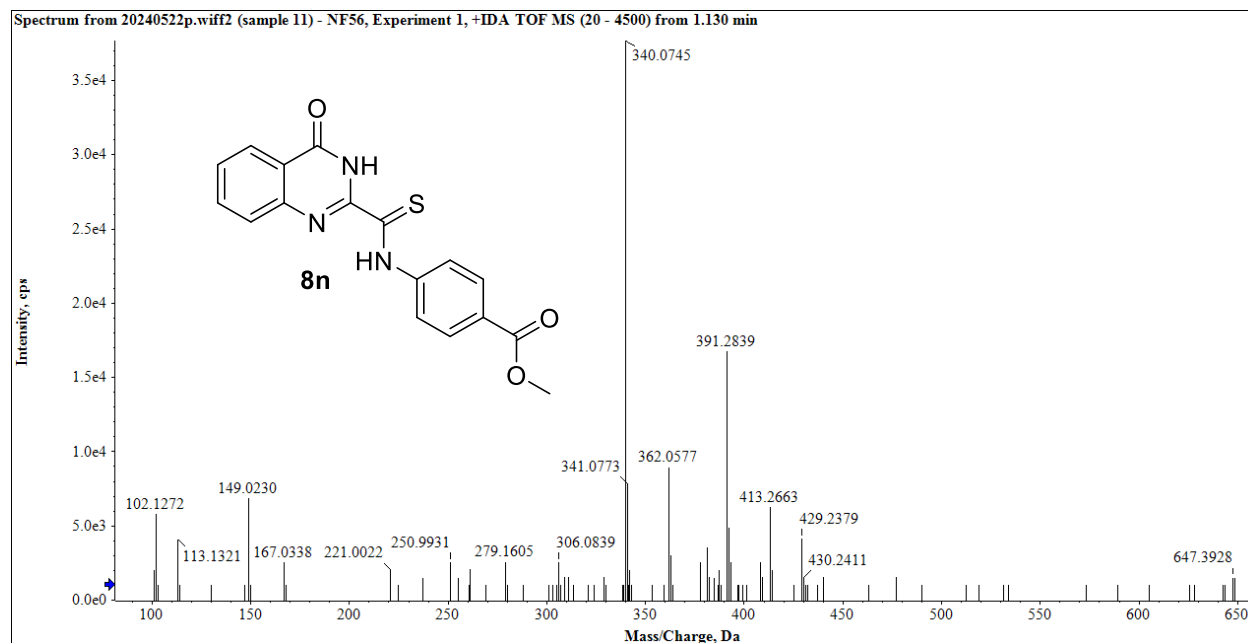

## IR of spectra compound **8o**

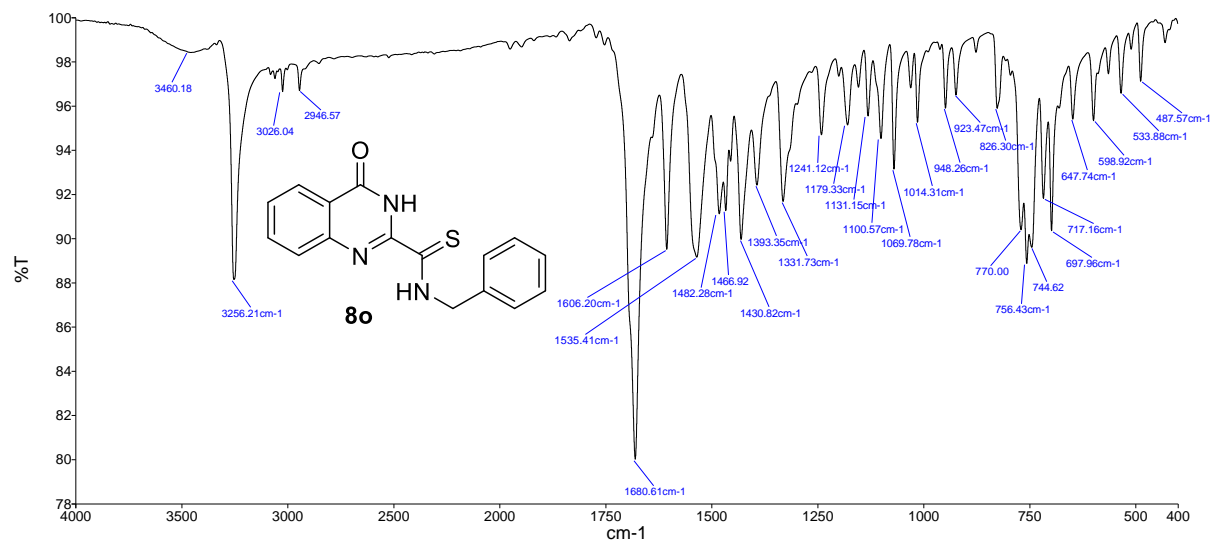

<sup>1</sup>H NMR (CDCl<sub>3</sub>, 600 MHz) spectrum of compound **8o**

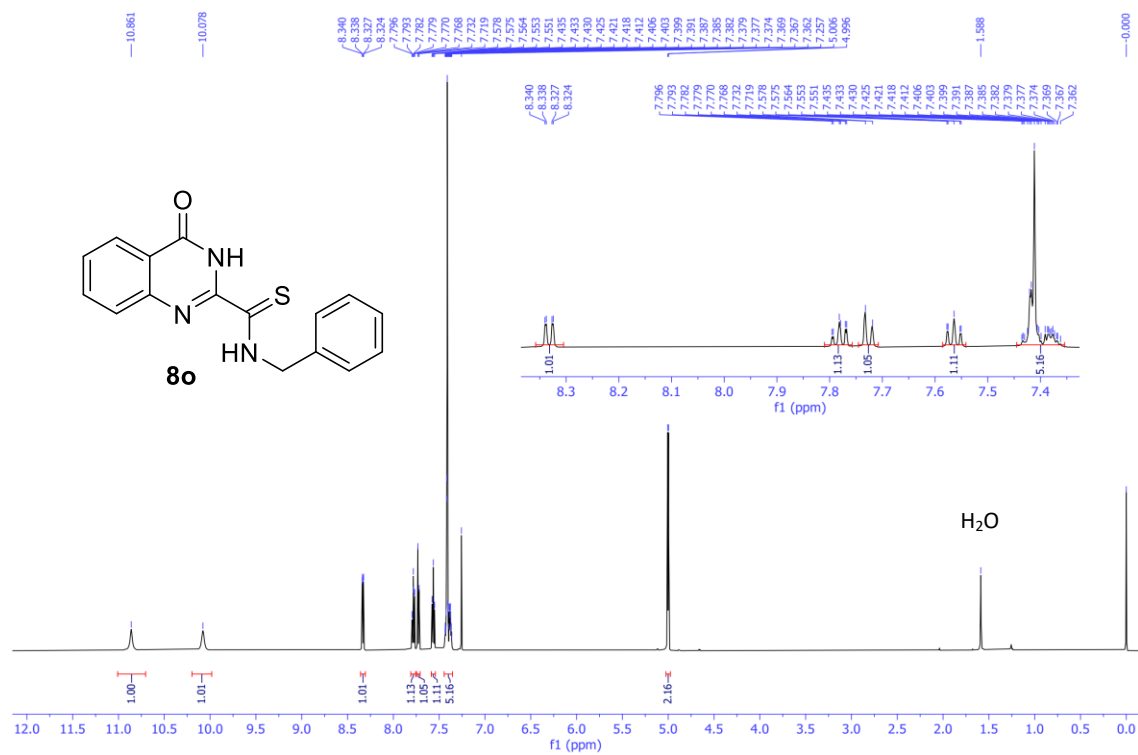

<sup>13</sup>C NMR (CDCl<sub>3</sub>, 150 MHz) spectrum compound **8o**

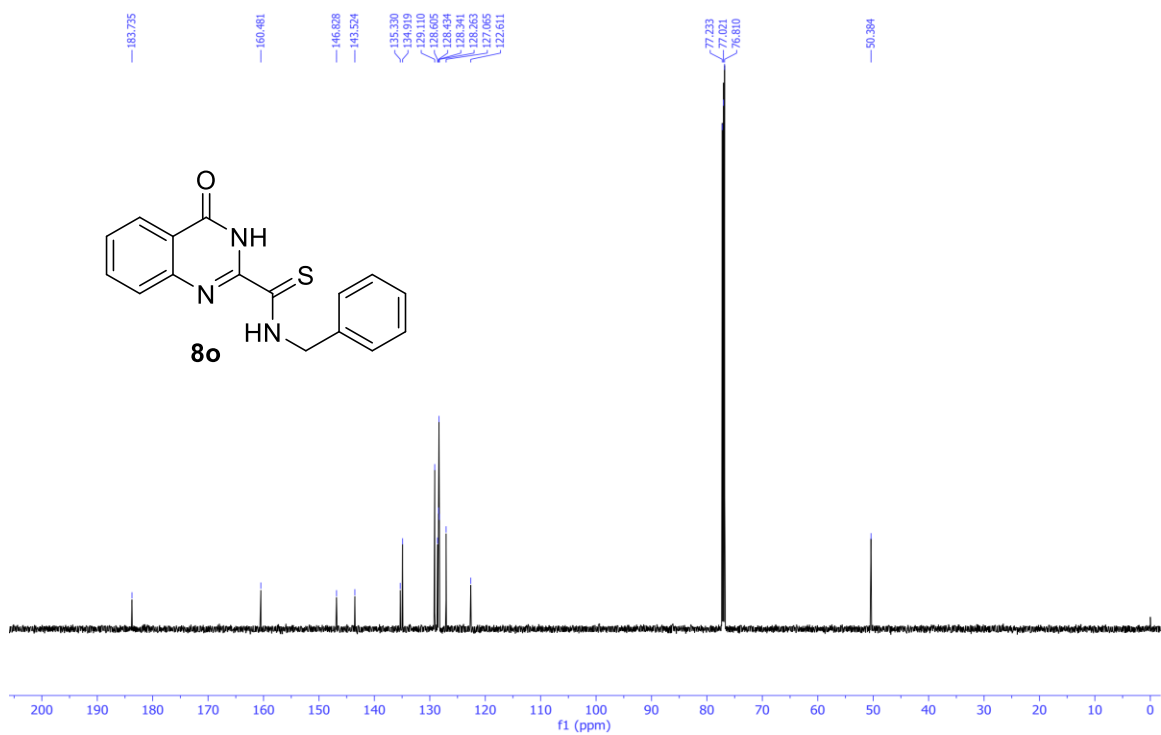



## HRMS spectrum of compound **8o**

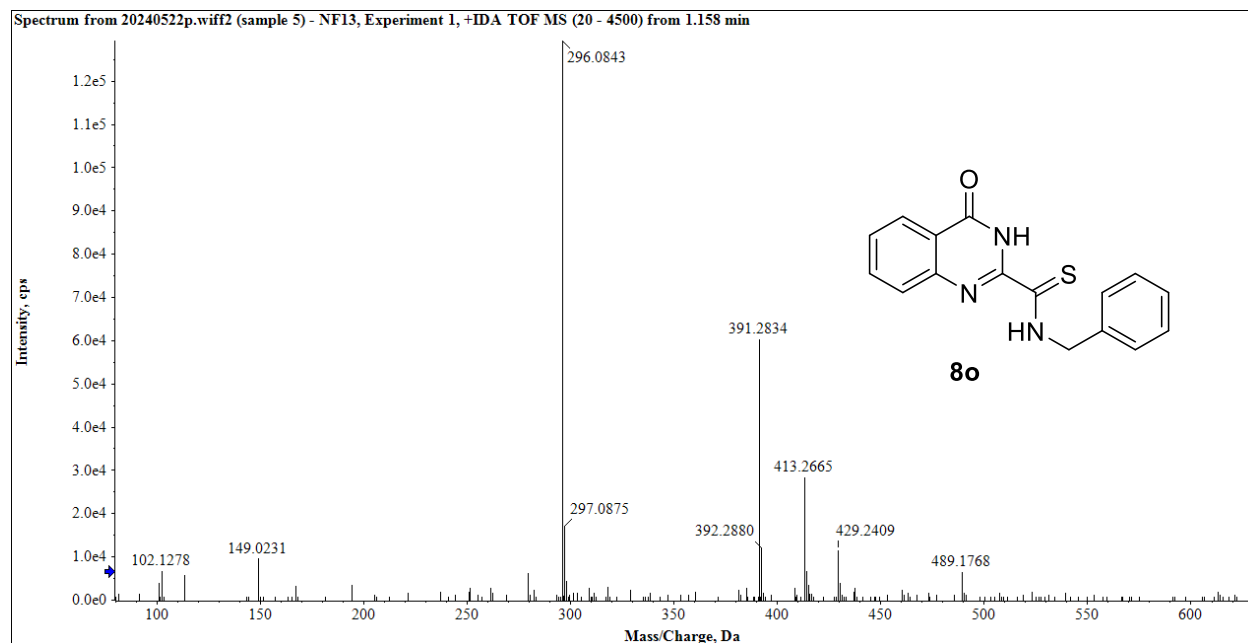

## IR of spectra compound **8p**

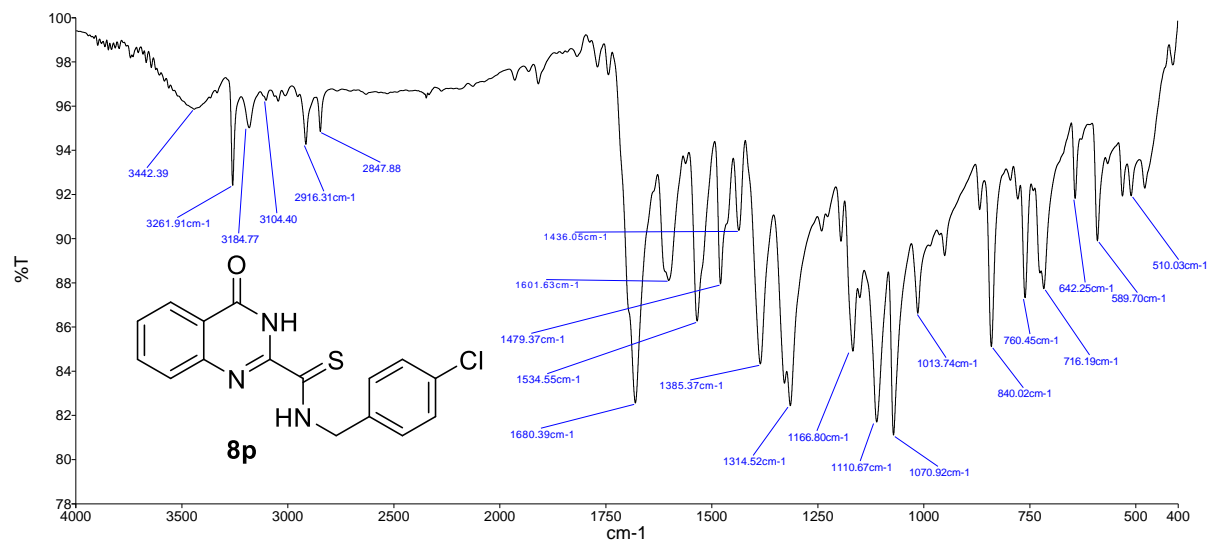

<sup>1</sup>H NMR (CDCl<sub>3</sub>, 600 MHz) spectrum of compound **8p**

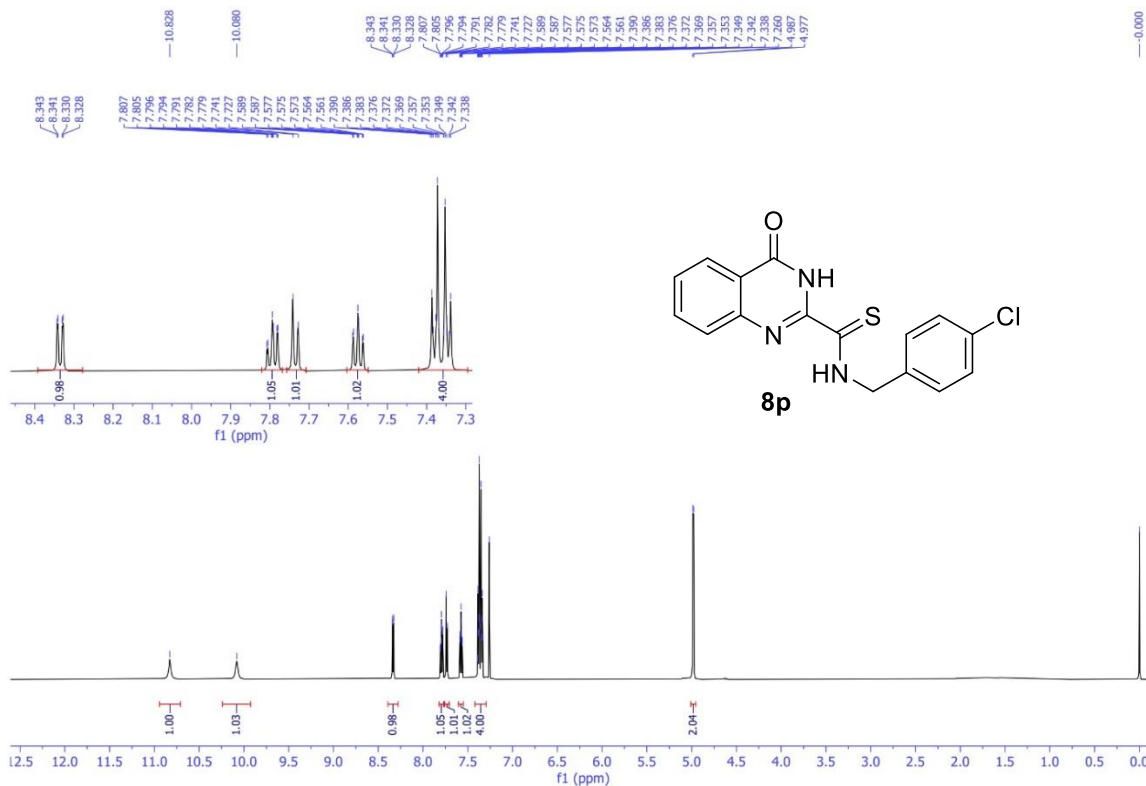

<sup>13</sup>C NMR (CDCl<sub>3</sub>, 150 MHz) spectrum compound **8p**

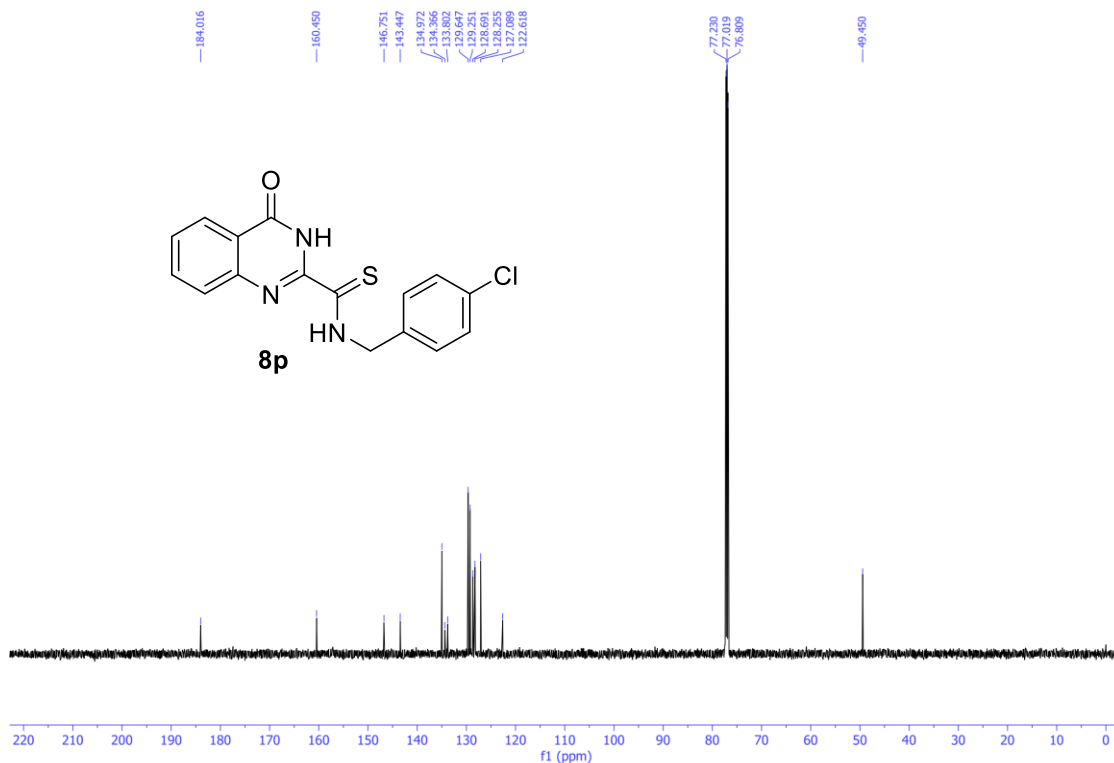

## HRMS spectrum of compound **8p**

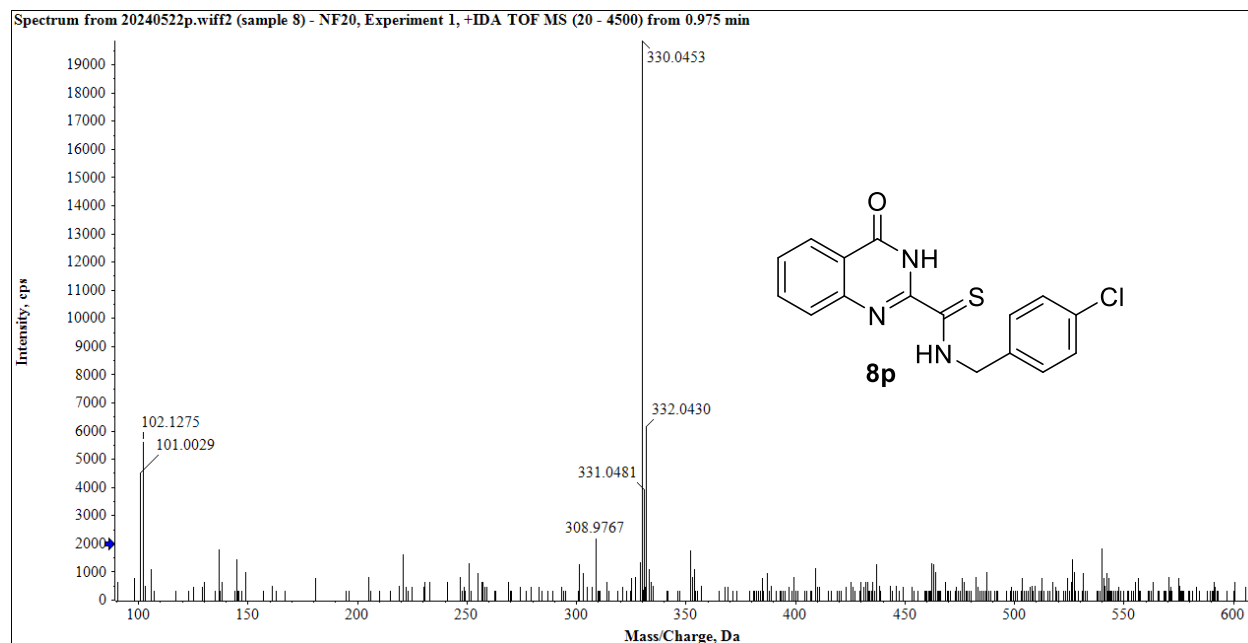

## IR of spectra compound **8q**

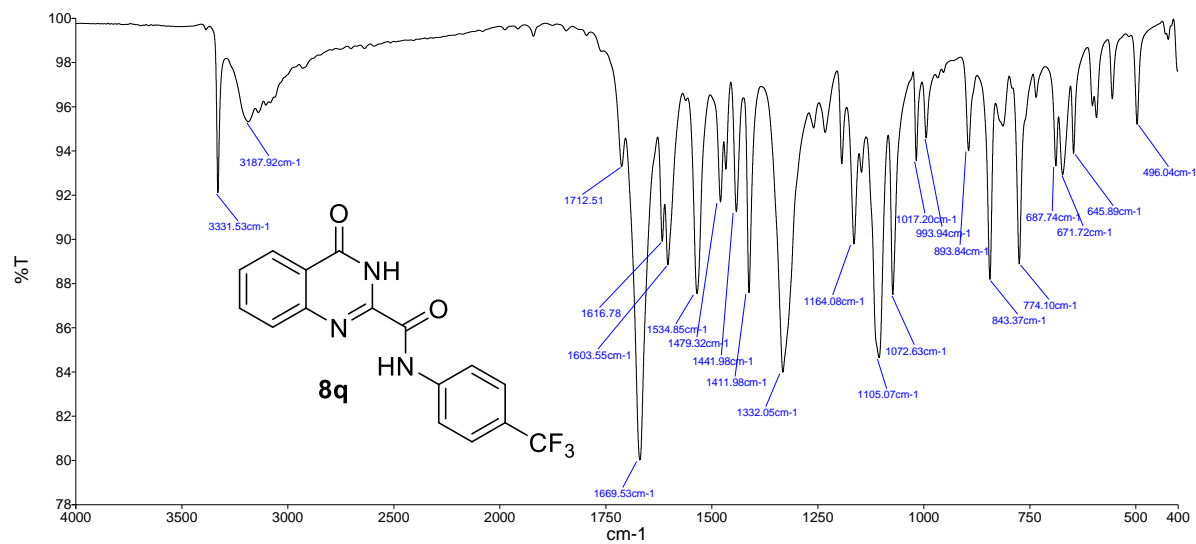

<sup>1</sup>H NMR (DMSO-*d*<sub>6</sub>, 600 MHz) spectrum of compound **8q**

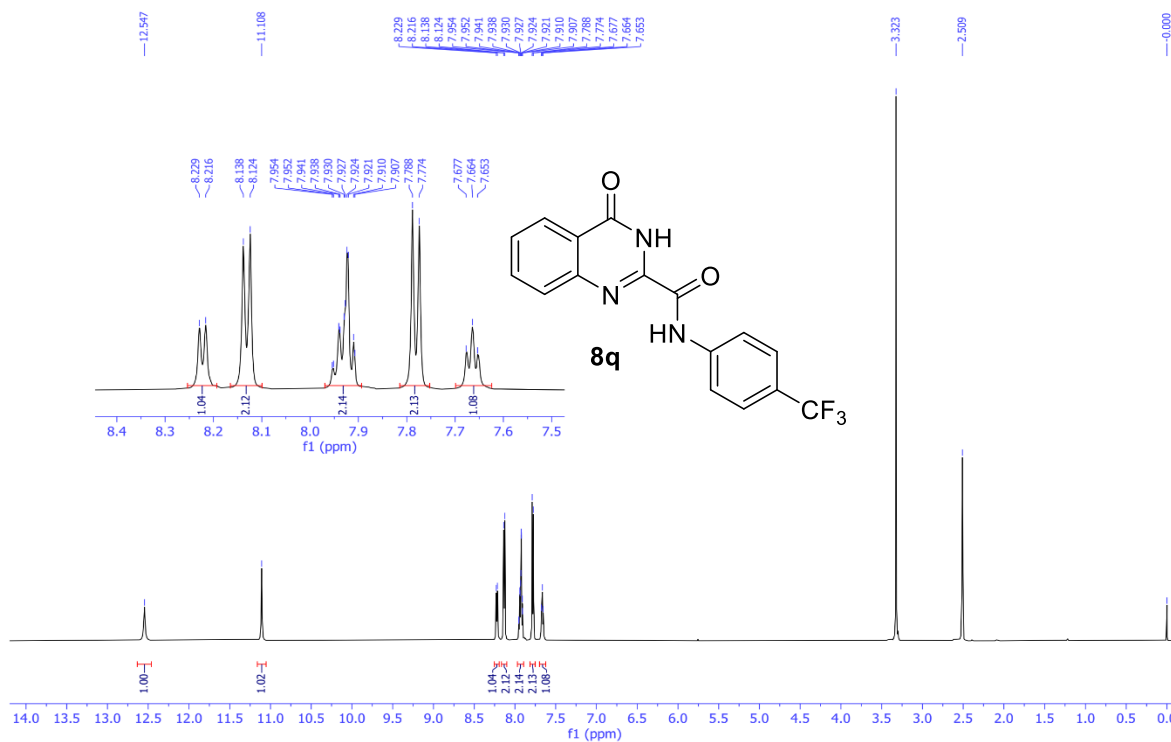

<sup>13</sup>C NMR (DMSO-*d*<sub>6</sub>, 150 MHz) spectrum compound **8q**

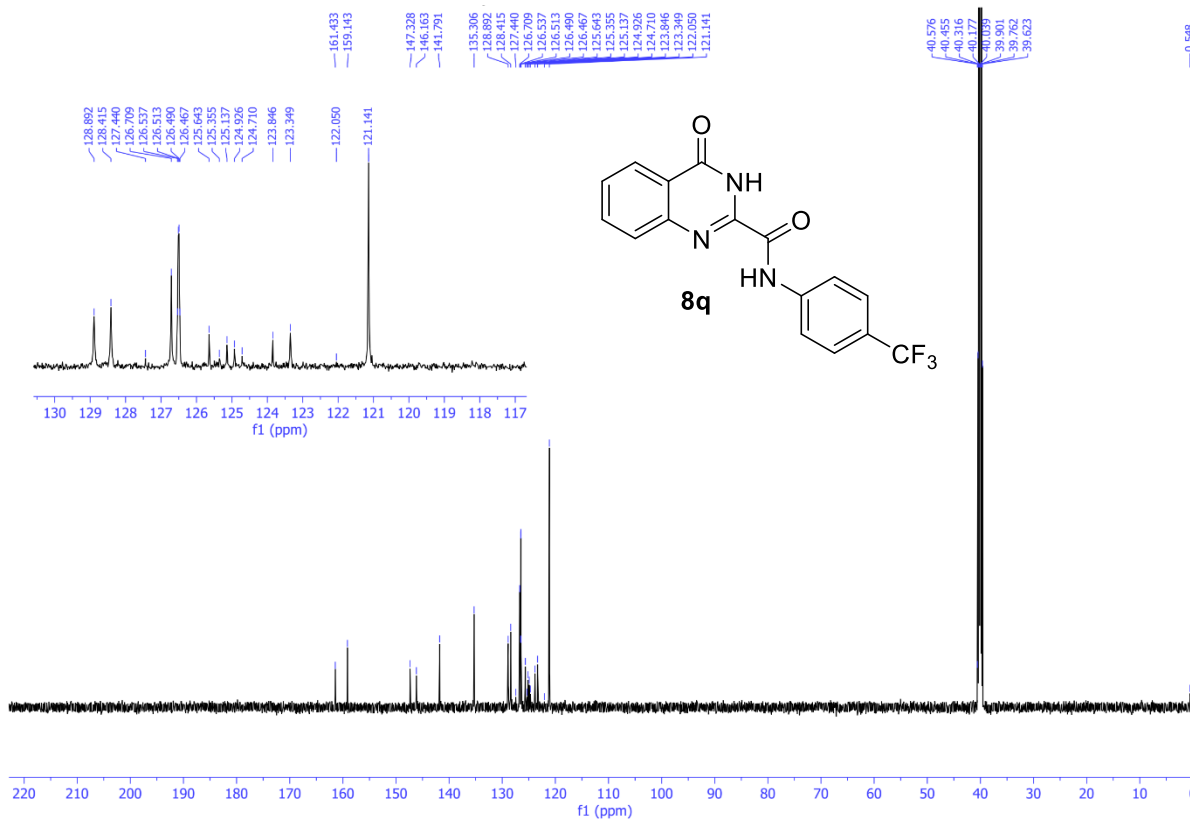

# HRMS spectrum of compound **8q**

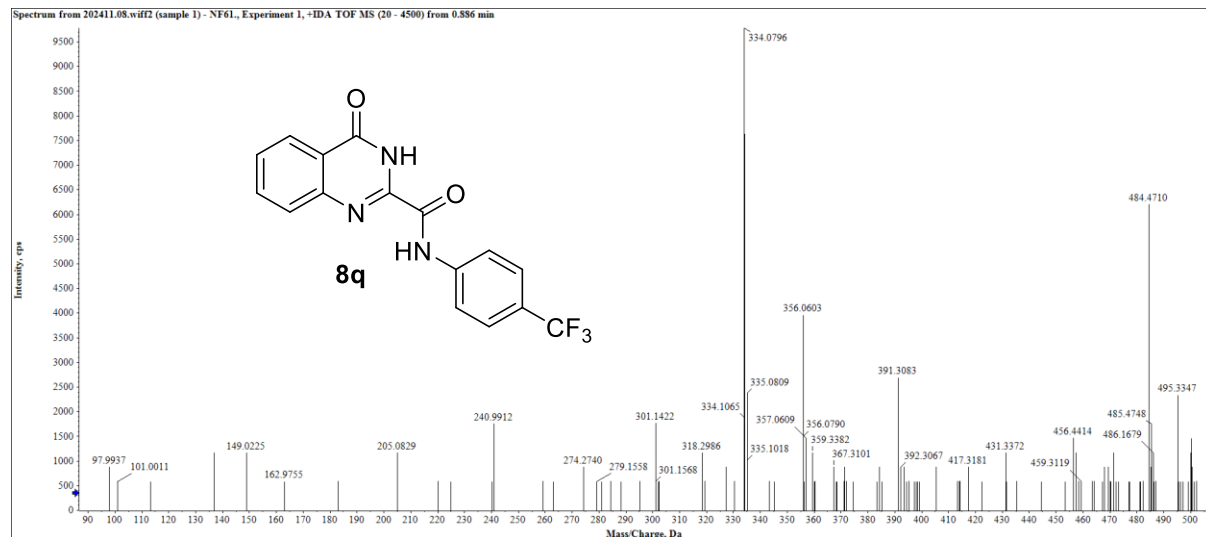

Supplement: d4ra09094b1.pdf [file d4ra09094b1.pdf]
